# Supplementary material
Source: PubMed Central journal article supplement (PMC6751085)
Supplement: EMS84347-supplement-Supplementary_Information.pdf [file EMS84347-supplement-Supplementary_Information.pdf]

In the format provided by the authors and unedited.

# Olfaction regulates organismal proteostasis and longevity via microRNA-dependent signalling

Fabian Finger <sup>1</sup>, Franziska Ottens<sup>1</sup>, Alexander Springhorn<sup>1</sup>, Tanja Drexel<sup>2</sup>, Lucie Proksch<sup>1</sup>,  
Sophia Metz <sup>1</sup>, Luisa Cochella<sup>2</sup> and Thorsten Hoppe <sup>1\*</sup>

---

<sup>1</sup>Institute for Genetics and CECAD Research Center, University of Cologne, Cologne, Germany. <sup>2</sup>Research Institute of Molecular Pathology (IMP), Vienna BioCenter (VBC), Vienna, Austria. \*e-mail: [thorsten.hoppe@uni-koeln.de](mailto:thorsten.hoppe@uni-koeln.de)

## Supplementary Figure 1

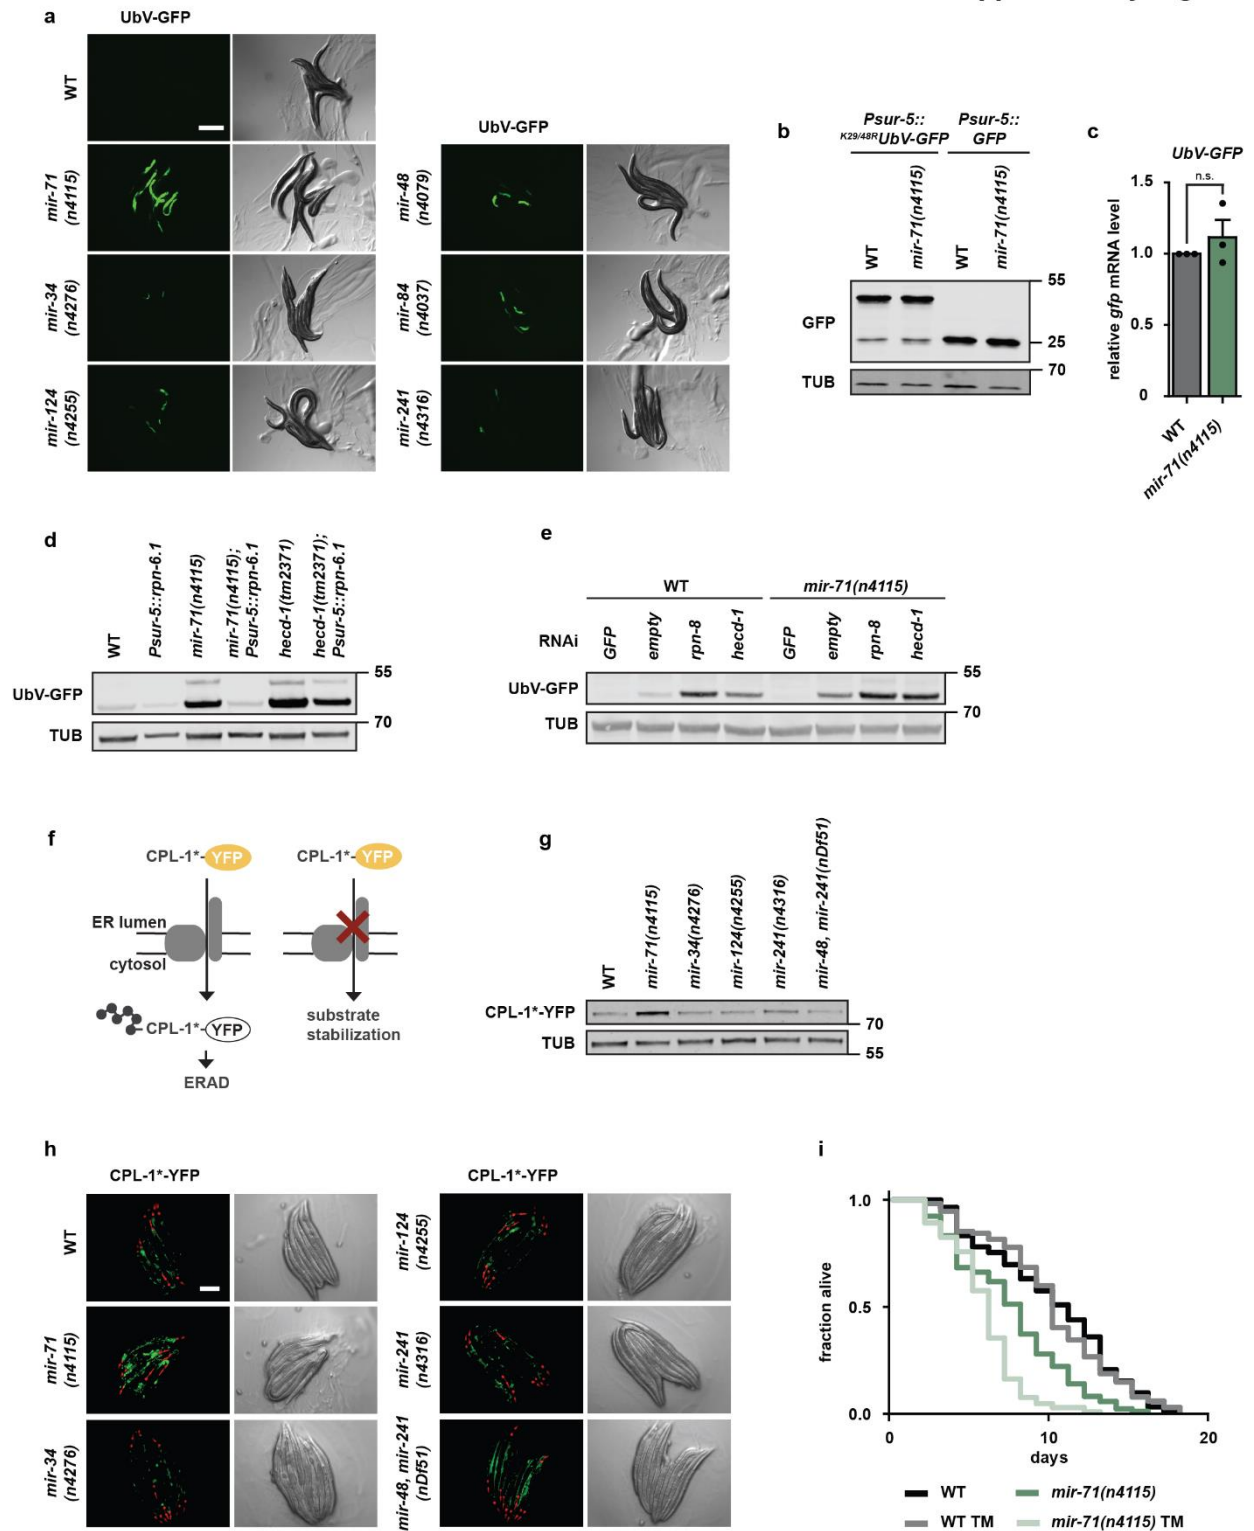

### Supplementary Figure 1 | Functional proteostasis requires the microRNA *mir-71*.

**a**, The *mir-71(n4115)* deletion allele exhibits stabilization of the UFD substrate. Fluorescent images of day 1 adult worms with indicated genotypes. Scale bar: 300  $\mu$ m. **b**, Accumulation

of the UFD substrate *Psur-5::UbV-GFP* in *mir-71(n4115)* is not a consequence of changes in gene expression. Western blot of worm lysates of indicated genotypes detect UbV-GFP, GFP, and tubulin (TUB). **c**, *UbV-GFP* mRNA levels are not increased in *mir-71(n4115)* mutant worms as tested by qRT-PCR. Data normalized to wild-type (WT). Bars show mean values  $\pm$  SEM obtained from n=3 biological replicates with 3 technical replicates each (mean values represented by dots); statistics were determined by two-tailed paired Student's t-test; ns=not significant). **d**, *mir-71* affects UFD substrate degradation downstream of ubiquitylation. Western blot from worm lysates with indicated genotypes showing UbV-GFP and tubulin (TUB) levels. **e**, Inhibition of proteasomal degradation in *mir-71(n4115)* worms further elevates UFD substrate levels. Western blot depicting UbV-GFP and tubulin (TUB) in RNAi-depleted worms lacking *rpn-8* or *hecd-1*. **f**, The CPL-1\*-YFP model substrate for studying ER-associated protein degradation (ERAD). **g**, The *mir-71(n4115)* deletion mutant accumulates the ERAD substrate. Western blot of worms imaged in (**h**) detecting CPL-1\*-YFP and tubulin (TUB). **h**, Fluorescent images of day 1 adult worms expressing the ERAD substrate (CPL-1\*-YFP); pharyngeal expression of *Pmyo-2::mCherry* served as transgenic marker. Scale bar: 250  $\mu$ m. **i**, *mir-71(n4115)* exhibits increased sensitivity to ER stress induced by tunicamycin (TM) treatment (50  $\mu$ g/ $\mu$ l). For statistics details see Supplementary Table 1. **a-b**, **d-e** and **g-h**, Representative data derived from at least 3 independent experiments with similar results. **b**, **d-e**, **g**, Molecular weights are shown in kilodalton (kDa).

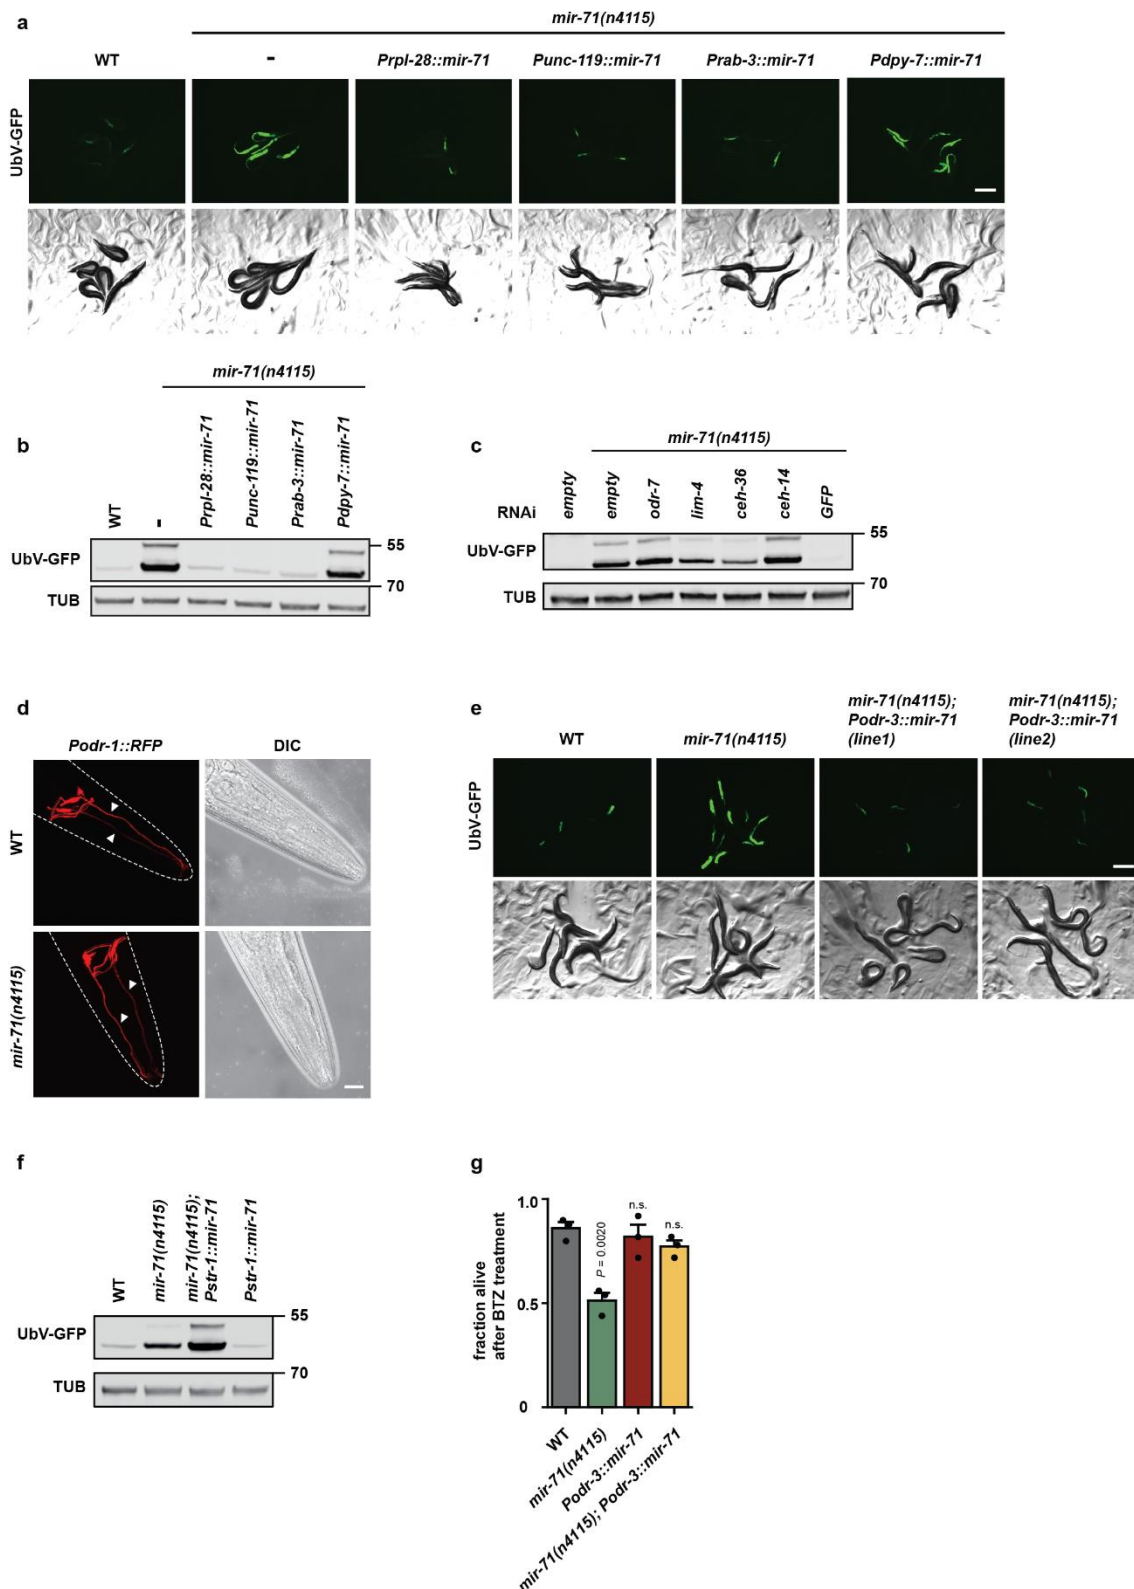

**Supplementary Figure 2 | Neuron-specific expression of *mir-71* modulates proteostasis.**

**a**, Neuronal expression of *mir-71* rescues protein degradation defects of *mir-71(n4115)*.

Fluorescent images of day 1 adult *mir-71(n4115)* worms expressing the UFD substrate and

the indicated tissue-specific rescue constructs *Prpl-28::mir-71* (ubiquitous), *Punc-119::mir-71* and *Prab-3::mir-71* (both pan-neuronal), *Pdpy7::mir-71* (hypodermal). Scale bar: 300  $\mu$ m. **b**, Western blot of worms imaged in **(a)** detect UbV-GFP and tubulin (TUB). **c**, Inhibition of neuronal development ameliorates *mir-71(n4115)* proteolytic defects. Western blot of *mir-71(n4115)* worms treated with RNAi against the indicated transcription factors show UbV-GFP and tubulin (TUB) levels. **d**, Deletion of *mir-71* does not affect AWC neuron morphology. Confocal microscopy images show AWC neurons (*Podr-1::RFP*) and differential interference contrast images (DIC) of the *C. elegans* head region. Scale bar: 15  $\mu$ m. **e**, AWC-specific rescue of the *mir-71(n4115)* deletion mutant (*mir-71(n4115); Podr-3::mir-71*) restores protein degradation. Fluorescent images of day 1 adult worms expressing the UFD substrate. Scale bar: 300  $\mu$ m. **f**, AWB-specific expression of *mir-71* (*Pstr-1::mir-71*) does not rescue proteostasis defects of *mir-71(n4115)* animals. Representative western blot of worm lysates with the indicated genotypes show UbV-GFP and tubulin (TUB). **a-f**, Representative data derived from at least 3 independent experiments with similar results. **b**, **c**, **f**, Molecular weights are shown in kDa. **g**, AWC-specific expression of *mir-71* increases survival upon proteasome inhibition (BTZ). Bars show mean values  $\pm$  SEM obtained from n=3 biological replicates using at least 50 worms (mean values represented by dots); statistics were determined by one-way ANOVA with post-hoc test; ns=not significant.

Supplementary Figure 3

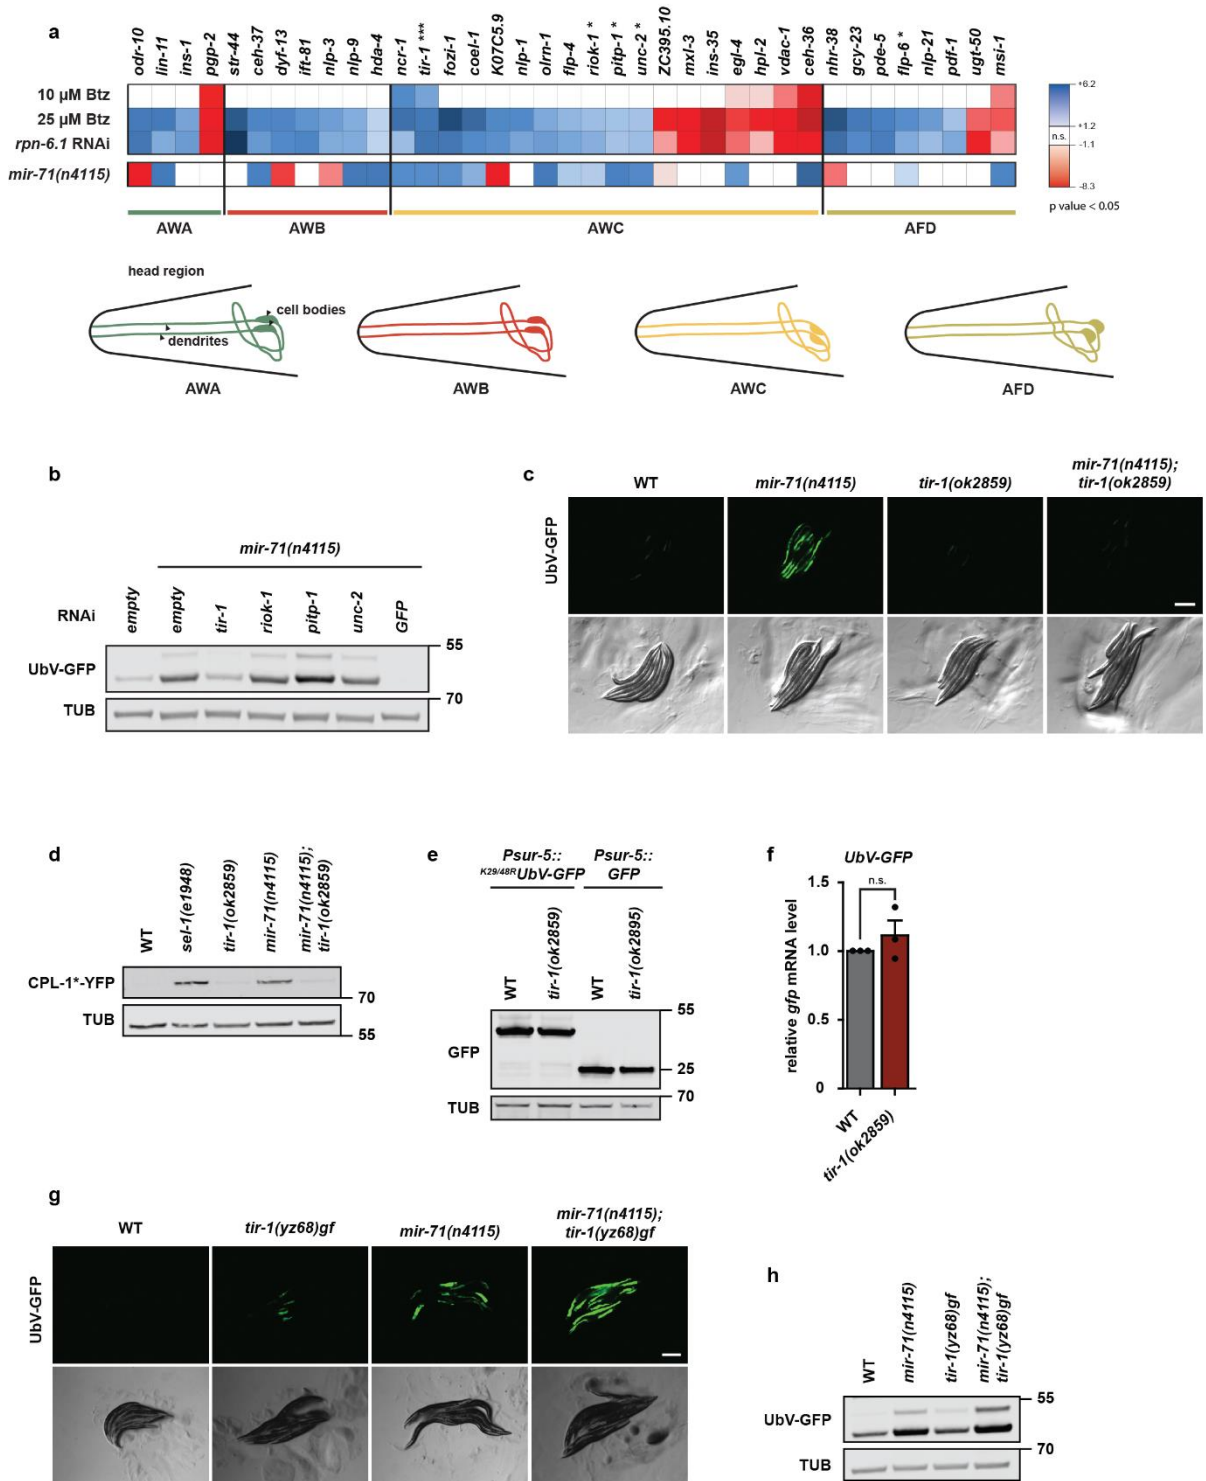

Supplementary Figure 3 | Genetic interaction between *mir-71* and *tir-1* affects proteostasis. **a**, *tir-1* mRNA levels are upregulated upon induction of proteotoxic stress and in *mir-71(n4115)*. Heat map of mRNA sequencing data for factors present in different

chemosensory neurons. A schematic depiction of the investigated amphid sensillum neurons in the *C. elegans* head region is shown at the bottom. Olfactory neurons: AWA = Amphid wing A cell (green), AWB = Amphid wing B cells (red), AWC = Amphid wing C cells (yellow); thermosensory neuron: AFD = Amphid neurons with finger-like (AFD) ciliated endings (light green). mRNA level in wild-type (WT) worms with proteasomal inhibition (10  $\mu$ M or 25  $\mu$ M BTZ or *rpn-6.1* RNAi) and in *mir-71(n4115)* deletion mutants are compared to WT (untreated) worms. Asterisks (\*) mark candidate transcripts that contain one (\*) or up to three (\*\*\*) potential *mir-71* binding sites; n.s.=not significant. Data derived from n=3 biological replicates **b**, *tir-1* depletion rescues *mir-71(n4115)* proteolytic defects. Western blot of *mir-71(n4115)* worm lysates treated with RNAi against the indicated factors show UbV-GFP and tubulin (TUB) levels. **c**, The *tir-1(ok2859)* deletion allele suppresses *mir-71(n4115)*-induced proteolytic defects. Fluorescent images of day 1 adult worms expressing the UFD substrate. Scale bar: 300  $\mu$ m. **d**, *tir-1(ok2859)* deletion is able to suppress ERAD substrate (CPL-1\*-YFP) stabilization in *mir-71(n4115)* worms. Western blot of worm lysates with indicated genotypes, detect CPL-1\*-YFP and tubulin (TUB). **e**, UFD substrate stabilization in the *tir-1(ok2859)* deletion mutant is not caused by changes in gene expression. Western blots from worm lysates show UbV-GFP, GFP, and tubulin (TUB). **f**, *UbV-GFP* transcript levels are not altered by *mir-71* or *tir-1* deletions as detected by qRT-PCR. Data normalized to wild-type (WT). Bars show mean values  $\pm$  SEM obtained from n=3 biological replicates with 3 technical replicates each (mean values represented by dots); statistics were determined by two-tailed paired Student's t-test; ns=not significant). **g-h**, The *tir-1* gain-of-function allele *tir-1(yz68)gf* leads to mild UPS defects. **g**, Fluorescent images of day 1 adult worms expressing the UFD substrate. Scale bar: 300  $\mu$ m. **h**, Detection of the GFP signals shown in **(g)** via western blot, showing UbV-GFP and tubulin (TUB) level. **b-e** and **g-h**,

Representative data derived from at least 3 independent experiments with similar results. **b**,

**d, e, h**, Molecular weights are shown in kDa.



Supplementary Figure 4

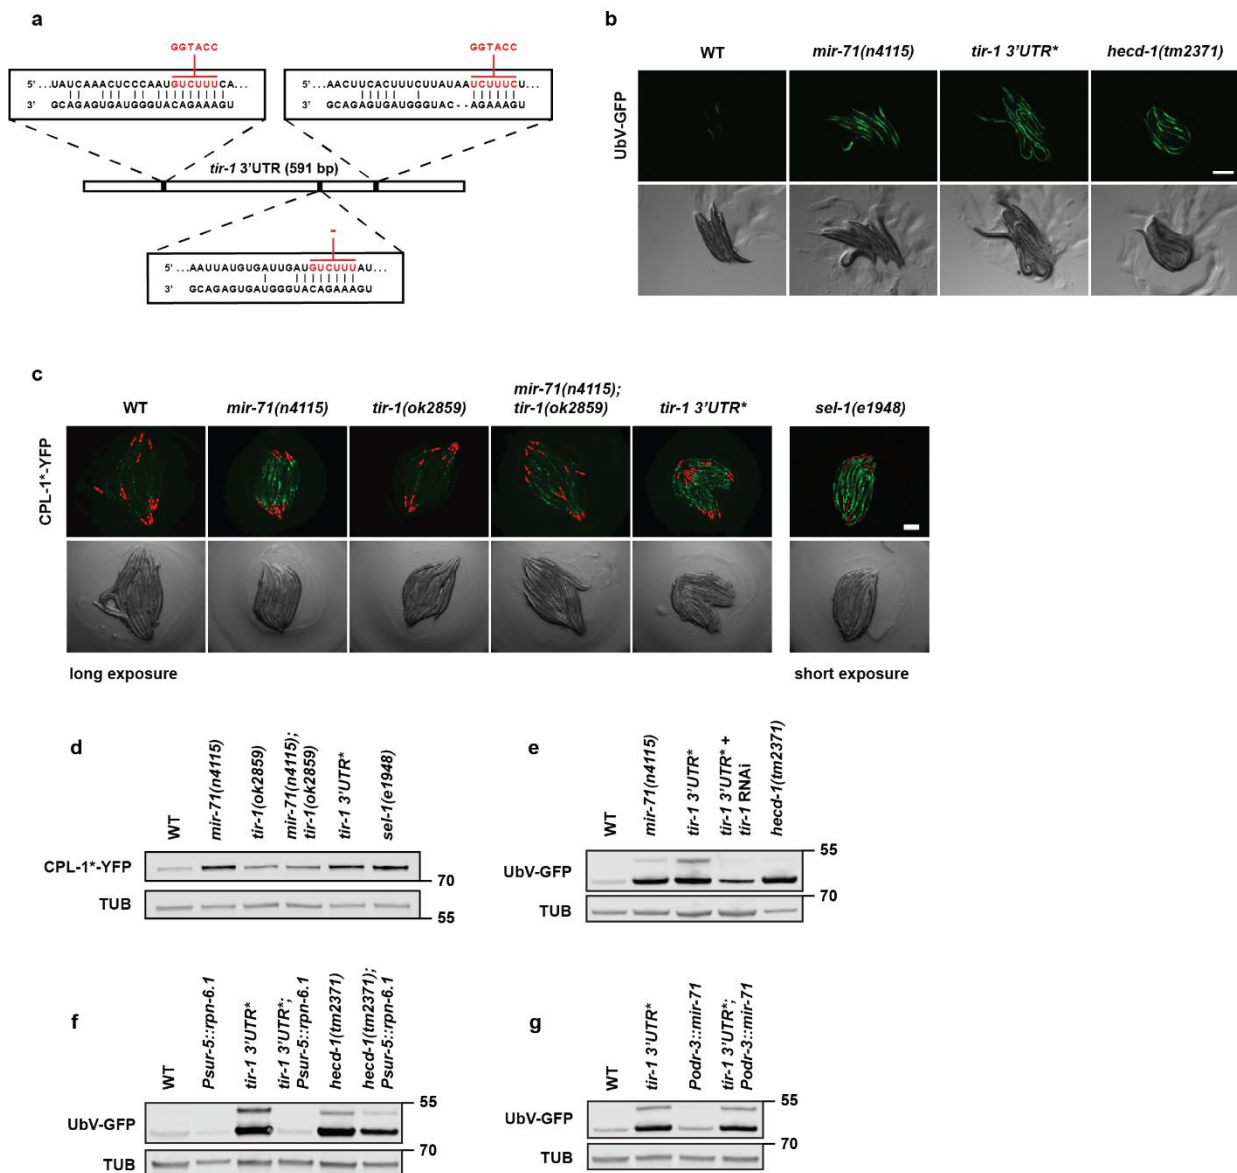

**Supplementary Figure 4 | Loss of *mir-71* binding sites in *tir-1* 3'UTR resembles proteolytic defects.** **a**, Schematic overview of the *tir-1* 3'UTR sequence with indicated base pairs (bp). Mutated *mir-71* binding sites in *tir-1* 3'UTR\* are shown in red. **b**, The *tir-1* 3'UTR\* mutation induces proteolytic defects. Fluorescent images of day 1 adult worms expressing the UFD substrate. Scale bar: 300  $\mu$ m. **c**, The *tir-1* 3'UTR\* mutant accumulates the ERAD substrate. Fluorescent images of day 1 adult worms expressing the ERAD

substrate (CPL-1\*-YFP); pharyngeal expression of *Pmyo-2::mCherry* served as transgenic marker. Scale bar: 250  $\mu$ m. **d-g**, Western blots from worm lysates of indicated genotypes detect CPL-1\*-YFP (**d**), UbV-GFP (**e-f**) and tubulin (TUB) protein level. Molecular weights are shown in kDa. **d**, The *tir-1 3'UTR\** mutation affects ERAD. Detection of the fluorescent signals shown in (c). **e**, RNAi-mediated *tir-1* depletion rescues UFD substrate stabilization in the *tir-1 3'UTR\** mutant. **f**, The *tir-1 3'UTR\** mutant triggers proteostasis defects downstream of substrate ubiquitylation. **g**, AWC-specific expression of *mir-71* does not suppress proteostasis defects caused by the *tir-1 3'UTR\** mutation. **b-g**, Representative data derived from at least 3 independent experiments with similar results.

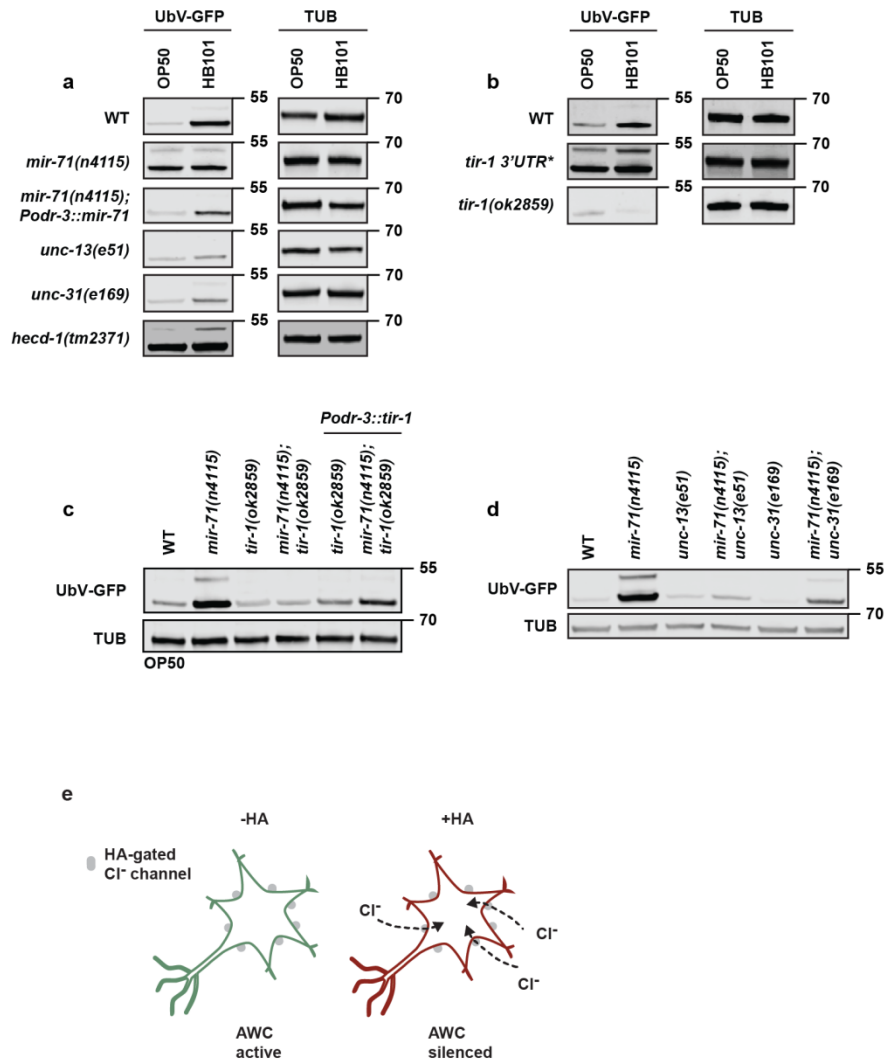

**Supplementary Figure 5 | Neuronal signaling facilitates *mir-71/tir-1* regulation of proteostasis.** **a-b**, Different food sources influence organismal protein degradation through *mir-71/tir-1* regulation. Animals were grown on indicated bacteria prior to lysis for western blotting. Western blots from day 1 adult worms of indicated genotypes show UbV-GFP and tubulin (TUB) level. **c**, AWC-specific *tir-1* expression is important for food perception and proteostasis. Animals were grown on OP50 bacteria prior to worm lysis. Western blot of worm lysates with the indicated genotypes detecting UbV-GFP and tubulin (TUB) level. **d**,

Inhibition of neuronal signal transduction suppresses *mir-71(n4115)* proteolytic defects. Western blot from worm lysates with indicated genotypes show UbV-GFP and tubulin (TUB) protein levels. **a-d**, Representative data derived from at least 3 independent experiments with similar results. **e**, Schematic depiction of AWC silencing by histamine-gated chloride channel expression (*Pceh-36::HisCl*).

## Supplementary Figure 6

uncropped blots related to Fig. 1:

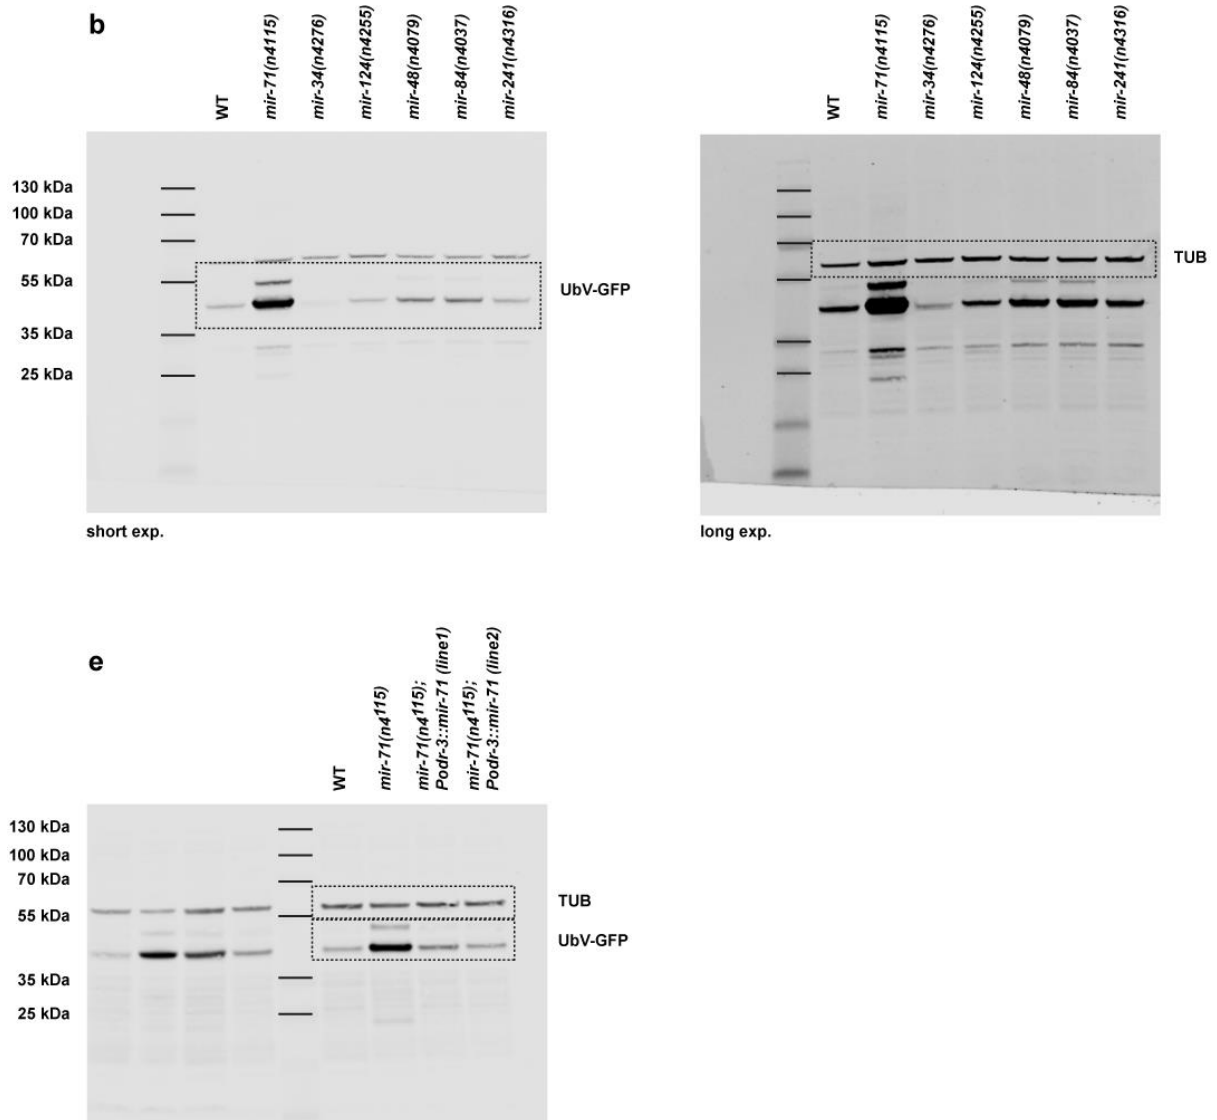

Supplementary Figure 6 (continued)

uncropped blots related to Fig. 2:

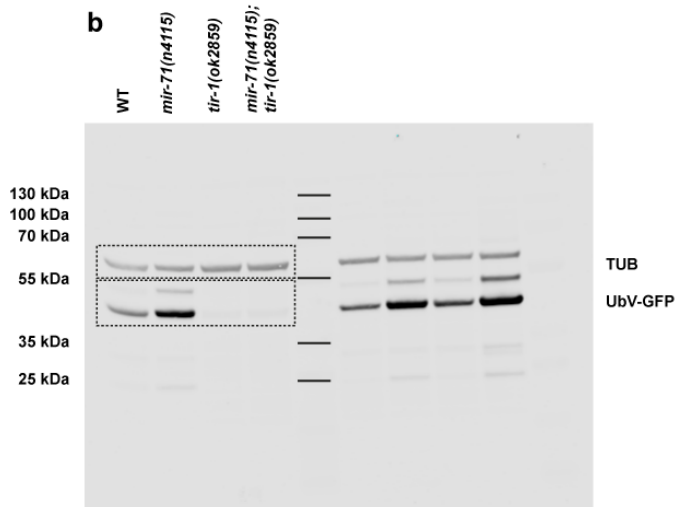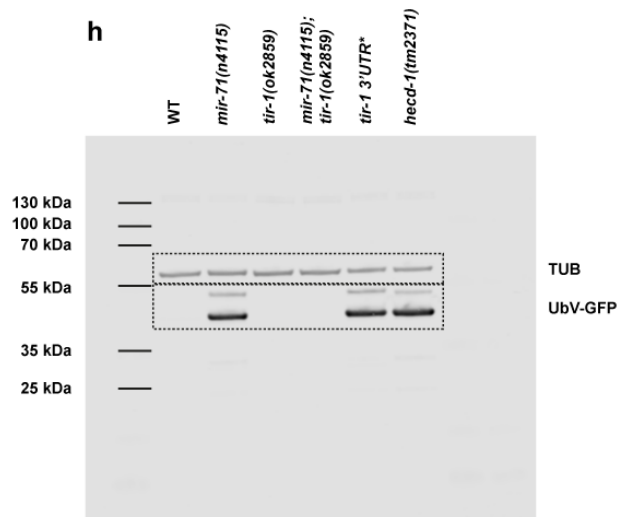

Supplementary Figure 6 (continued)

uncropped blots related to Fig. 3:

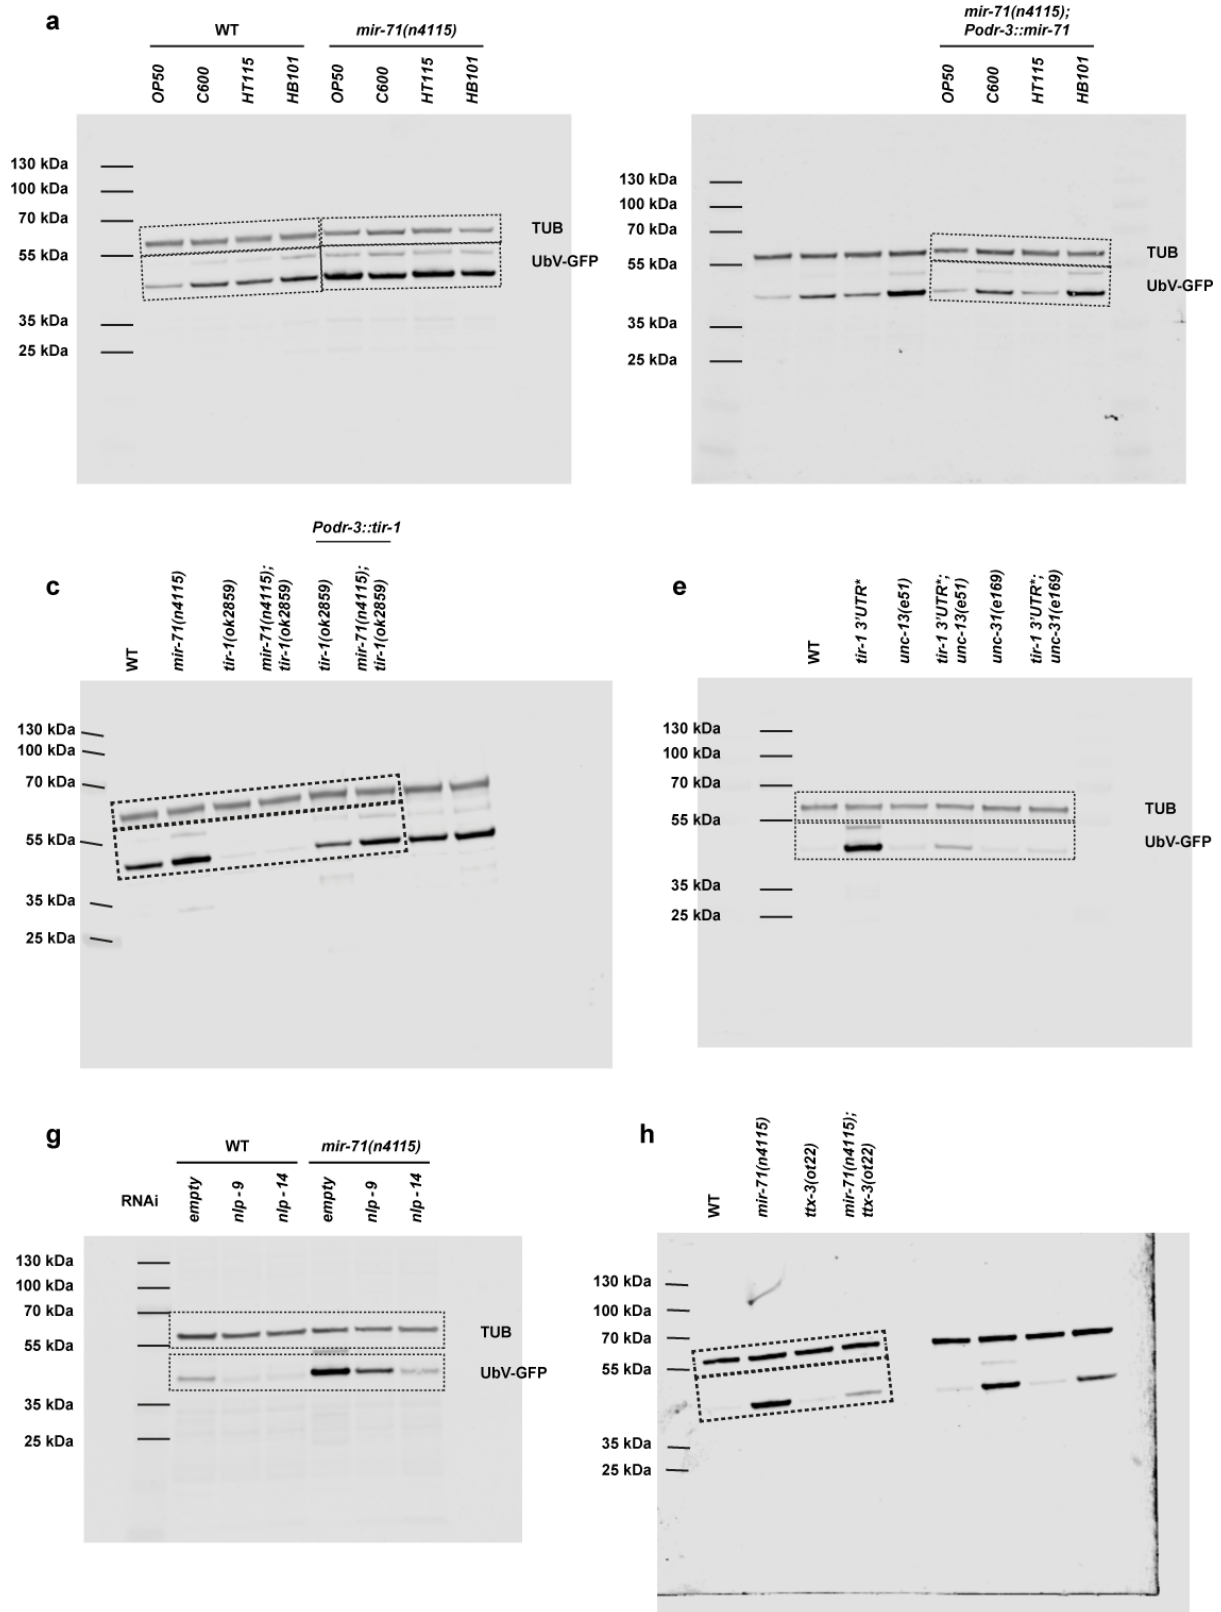

Supplementary Figure 6 (continued)

uncropped blots related to Fig. 4:

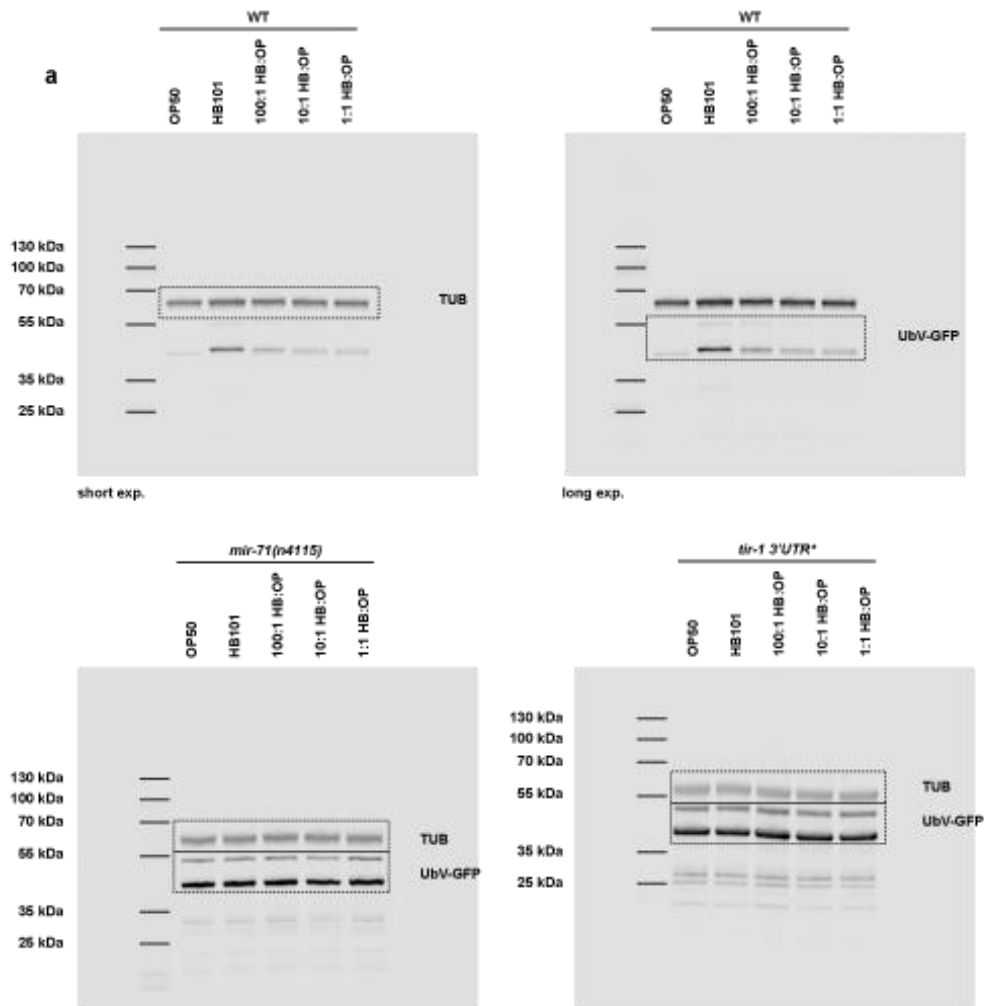



Supplementary Figure 6 (continued)

uncropped blots related to Fig. 4:

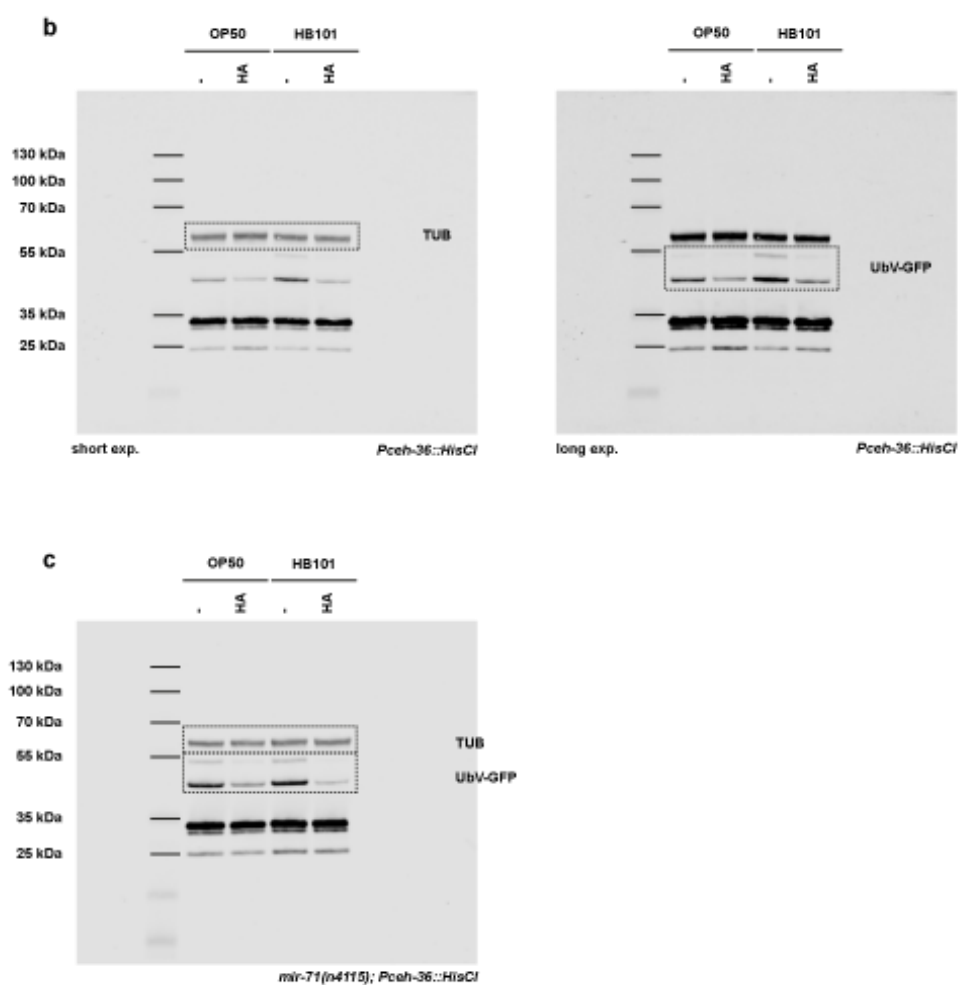

Supplementary Figure 6 (continued)

uncropped blots related to Supplementary Fig. 1:

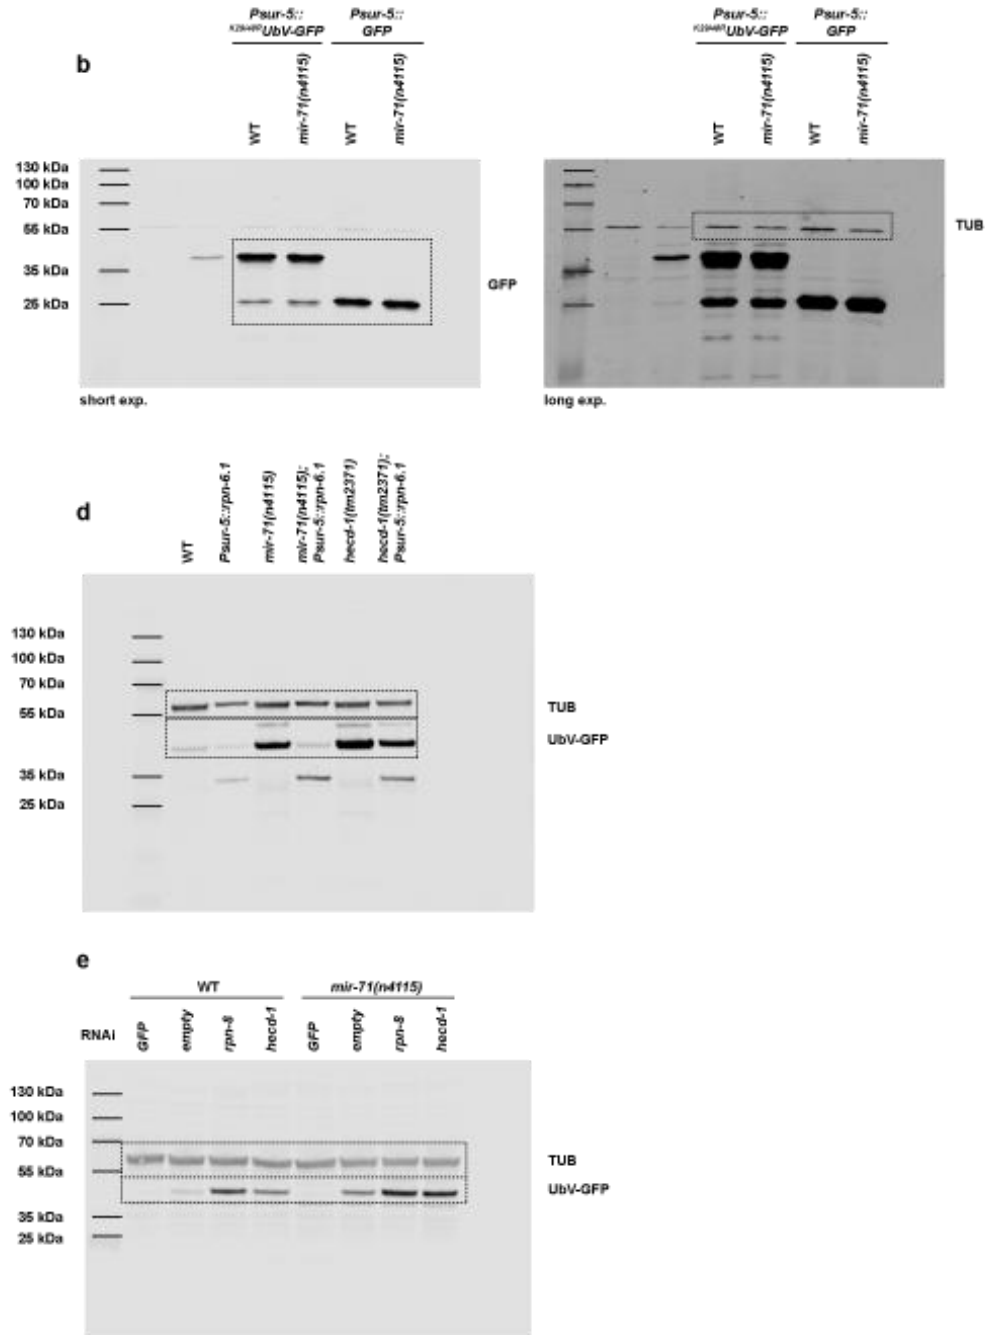

Supplementary Figure 6 (continued)

uncropped blots related to Supplementary Fig. 1:

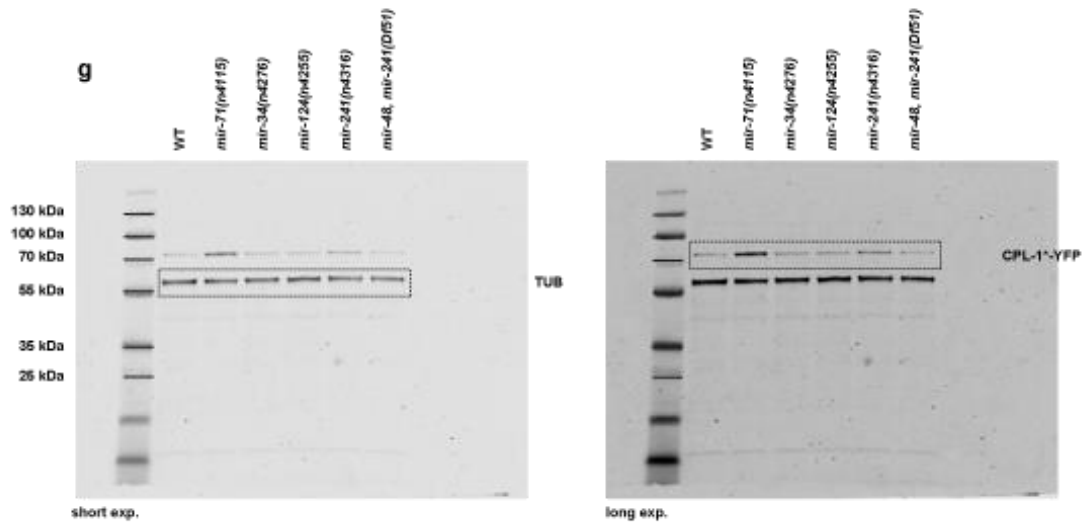

Supplementary Figure 6 (continued)

uncropped blots related to Supplementary Fig. 2:

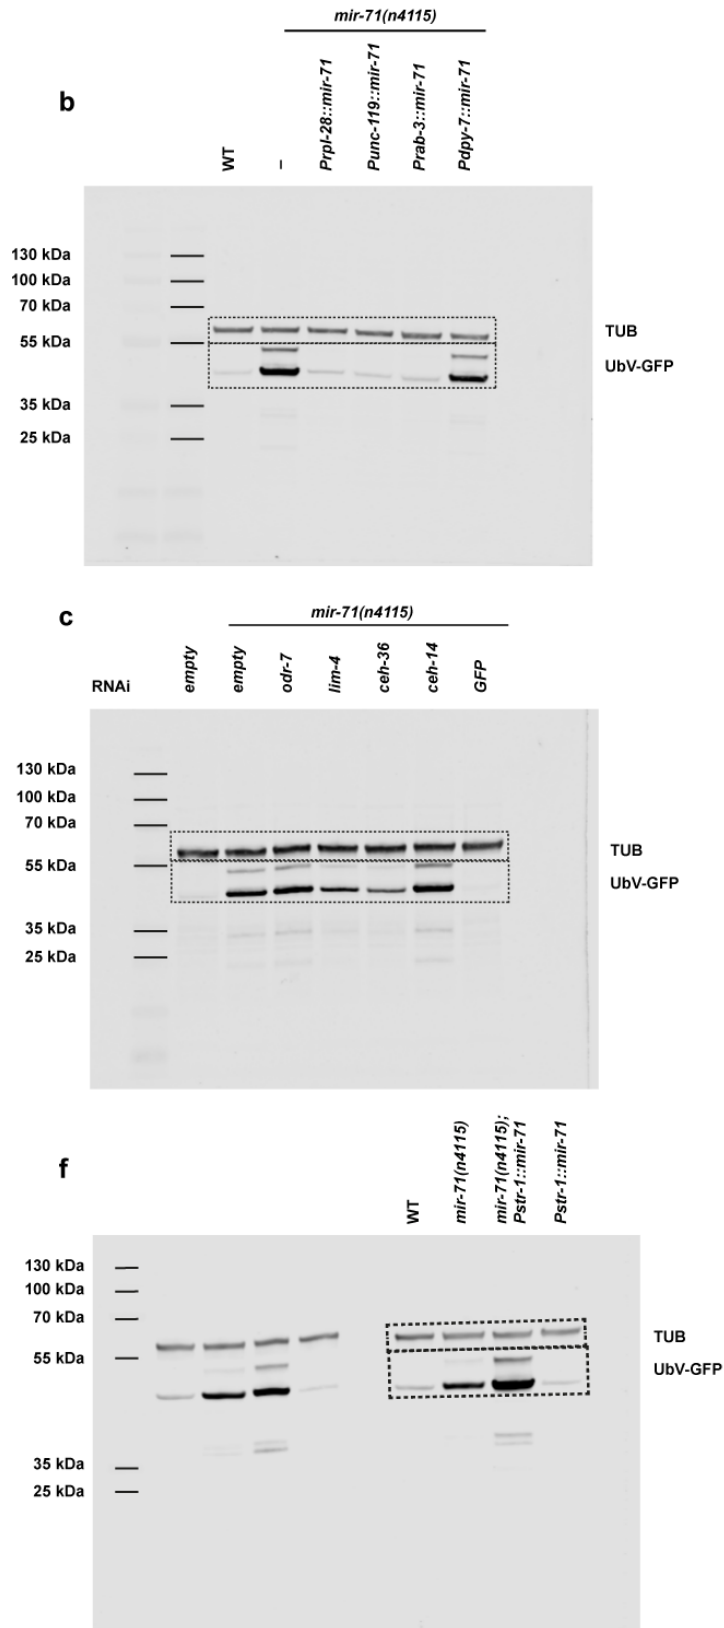

Supplementary Figure 6 (continued)

uncropped blots related to Supplementary Fig. 3:

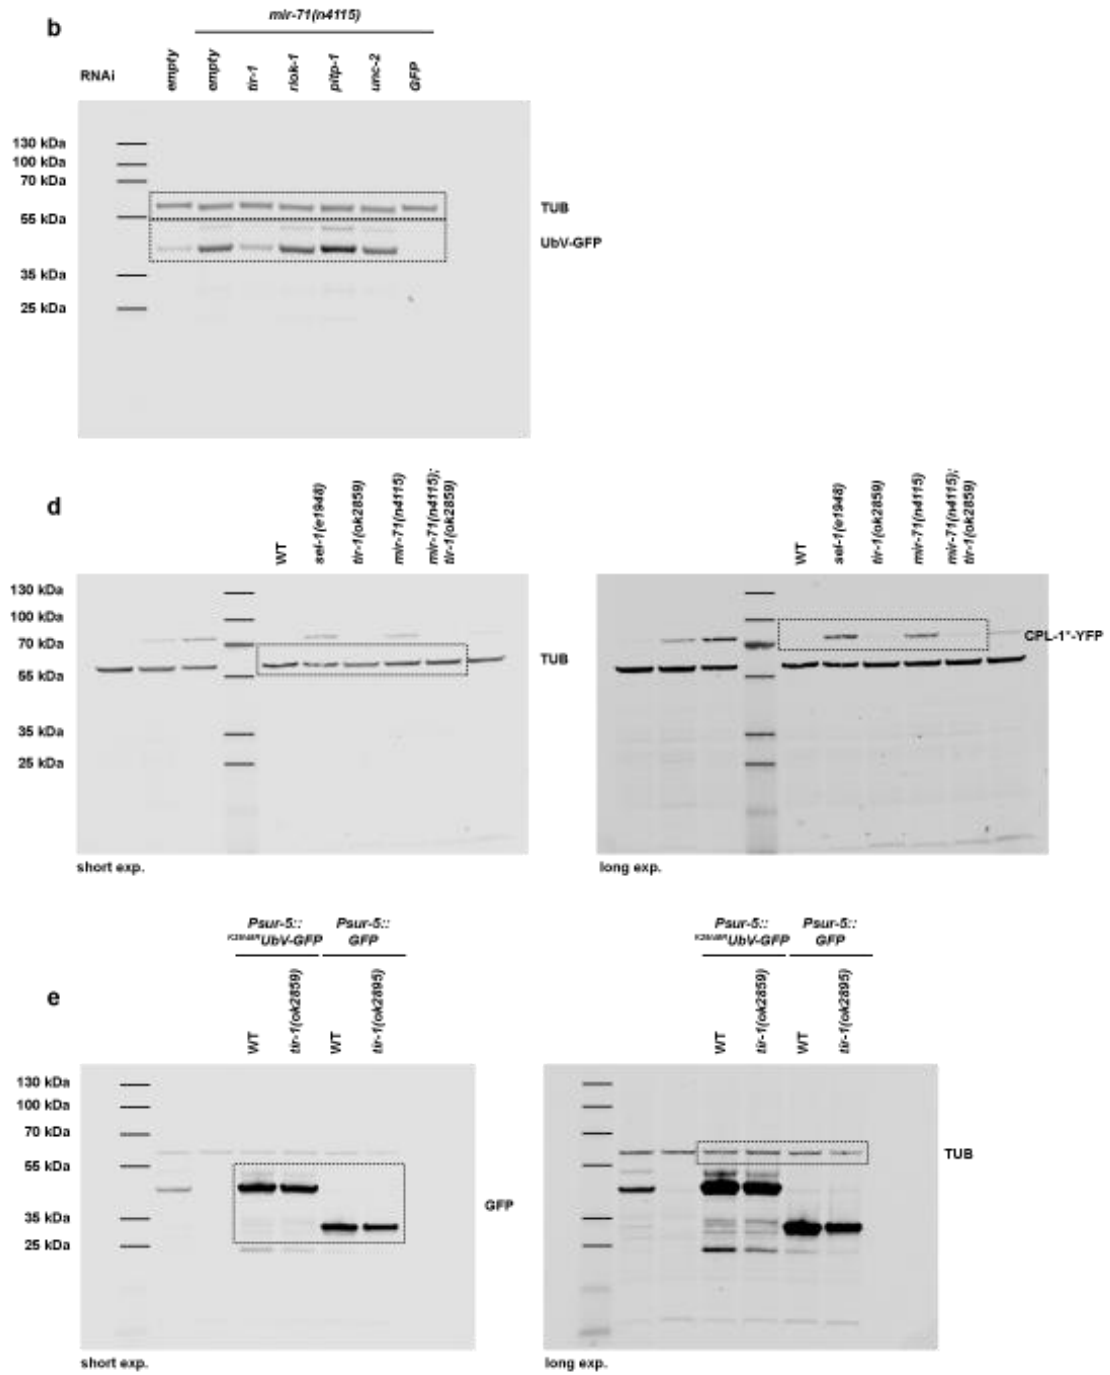

Supplementary Figure 6 (continued)

uncropped blots related to Supplementary Fig. 3:

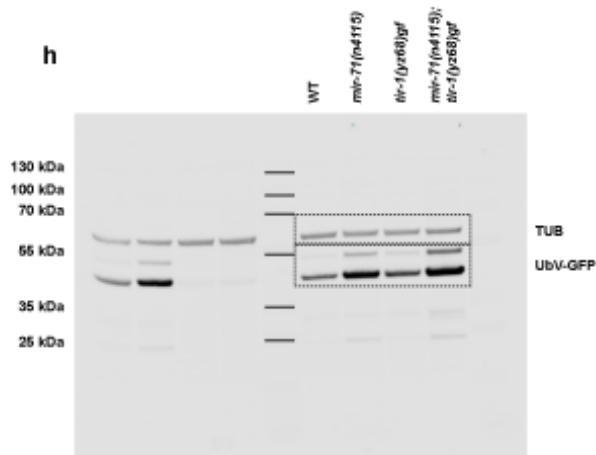

Supplementary Figure 6 (continued)

uncropped blots related to Supplementary Fig. 4:

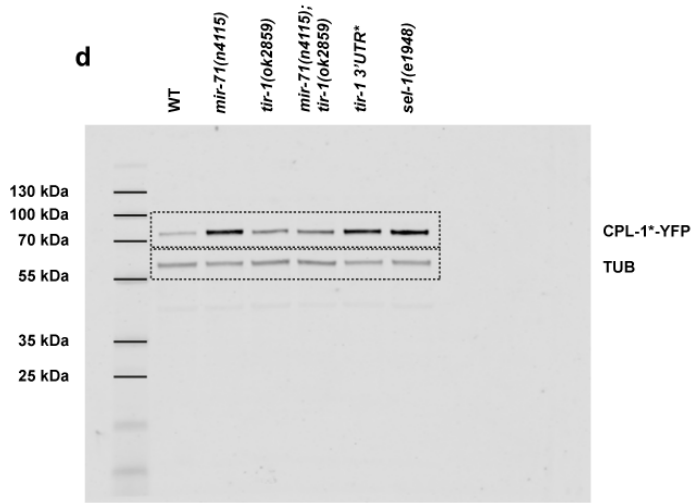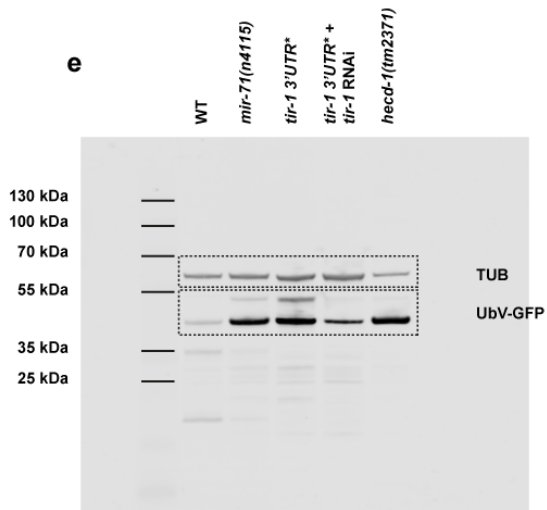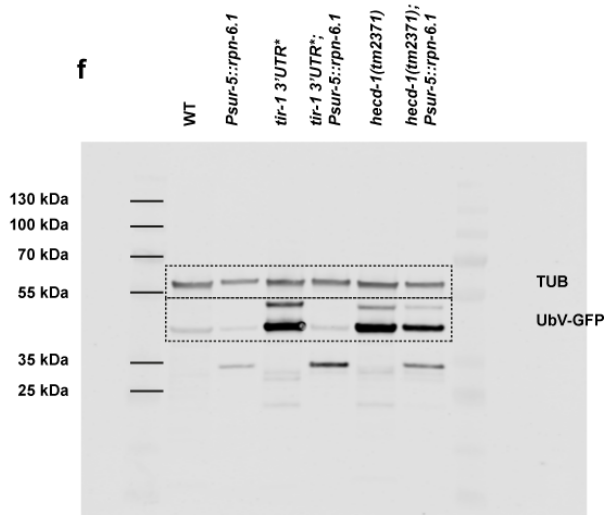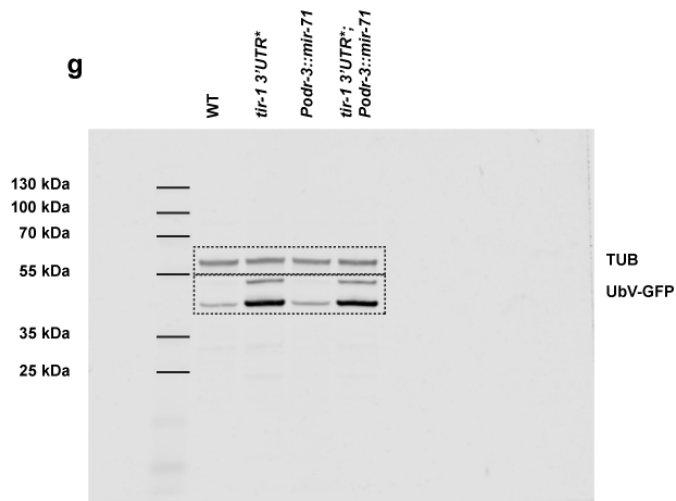

Supplementary Figure 6 (continued)

uncropped blots related to Supplementary Fig. 5:

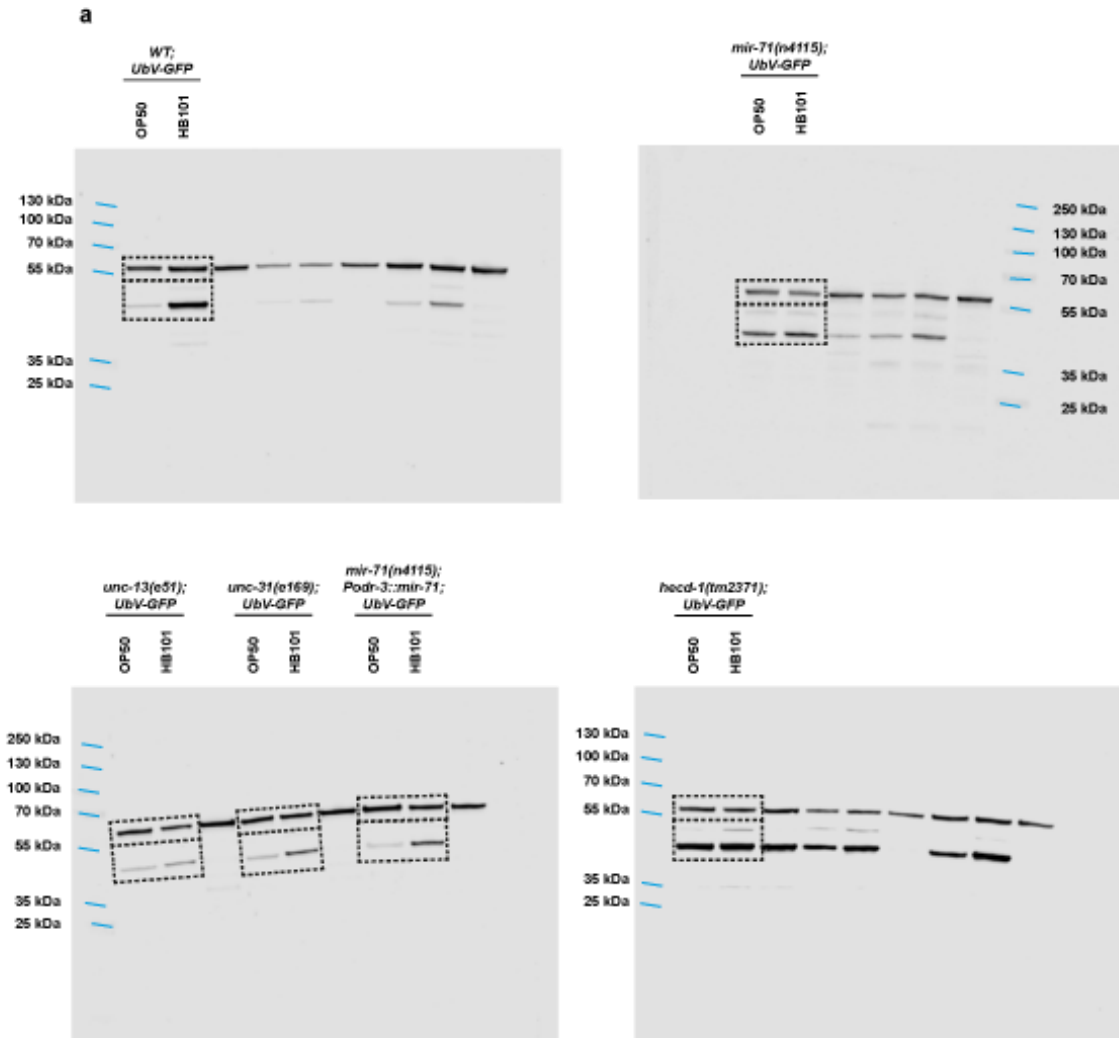



Supplementary Figure 6 (continued)

uncropped blots related to Supplementary Fig. 5:

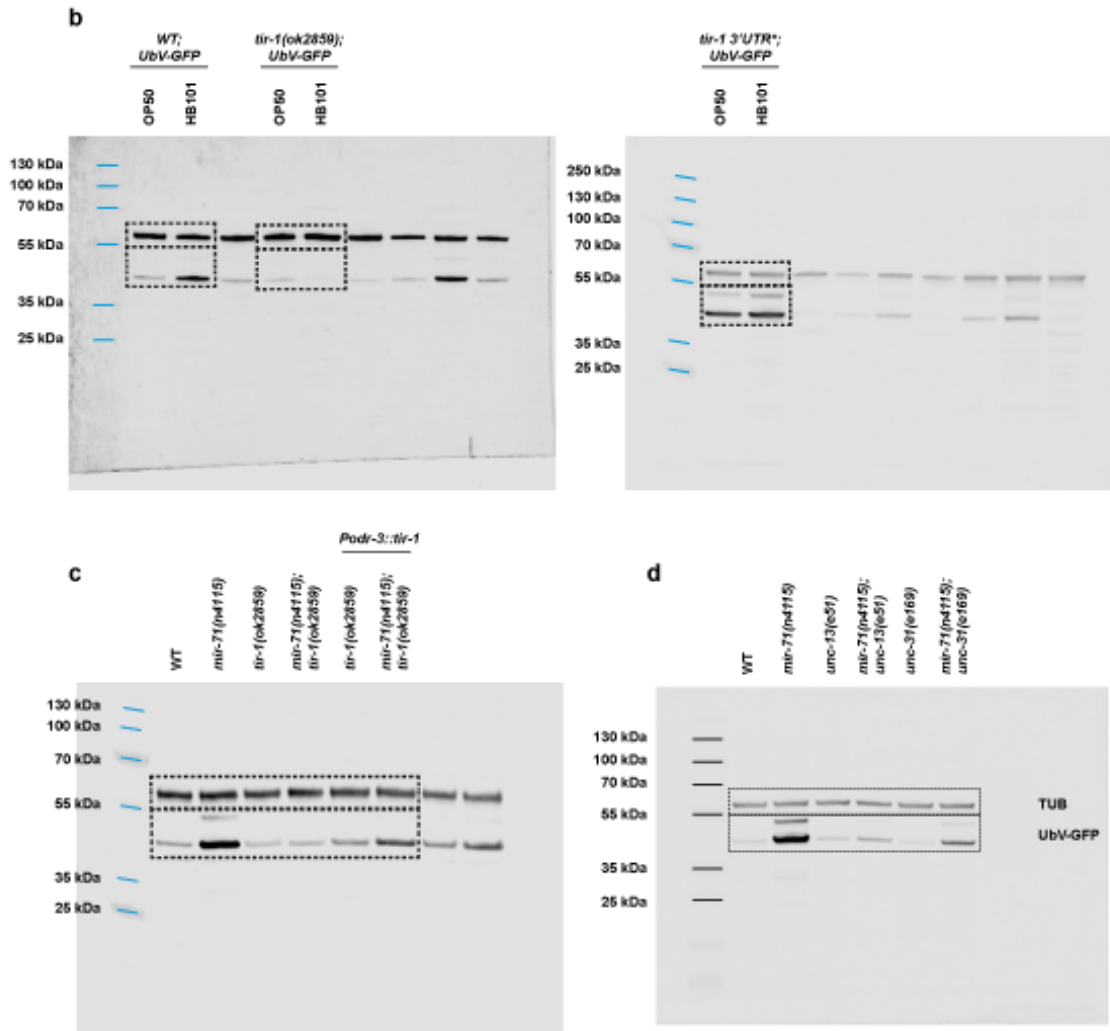

# Supplementary Table 1

Summary of lifespan experiments

Statistics were determined by using a two-sided Log-rank (Mantel-Cox) test

| 20°C            | Genotype                                                      | Median Lifespan (Days) | % increase median lifespan | Log Rank P Value | Total Animals Died/Total | % increase median lifespan compared to <i>mir-7</i> ( <i>l4115</i> ) mutant | Log Rank P Value compared to <i>mir-7</i> ( <i>l4115</i> ) mutant | % increase median lifespan compared to <i>mir-7</i> ( <i>l4115</i> ); <i>odf-3p::mir-71</i> mutant | Log Rank P Value compared to <i>mir-7</i> ( <i>l4115</i> ); <i>odf-3p::mir-71</i> mutant |
|-----------------|---------------------------------------------------------------|------------------------|----------------------------|------------------|--------------------------|-----------------------------------------------------------------------------|-------------------------------------------------------------------|----------------------------------------------------------------------------------------------------|------------------------------------------------------------------------------------------|
| (exp. 1)        | WT                                                            | 17                     |                            |                  | 95/102                   |                                                                             |                                                                   |                                                                                                    |                                                                                          |
|                 | <i>mir-7</i> ( <i>l4115</i> )                                 | 10.00                  | -41.18                     | < 0.0001         | 92/102                   |                                                                             |                                                                   |                                                                                                    |                                                                                          |
|                 | <i>mir-7</i> ( <i>l4115</i> ); <i>odf-3p::mir-71</i>          | 22.00                  | 29.41                      | < 0.0001         | 84/100                   | 120.00                                                                      |                                                                   |                                                                                                    |                                                                                          |
|                 | <i>P60S::mir-71</i>                                           | 22.00                  | 29.41                      | < 0.0001         | 91/100                   |                                                                             | 0.00                                                              |                                                                                                    | 0.2132                                                                                   |
| (exp. 2)        | WT                                                            | 16.5                   |                            |                  | 95/100                   |                                                                             |                                                                   |                                                                                                    |                                                                                          |
|                 | <i>mir-7</i> ( <i>l4115</i> )                                 | 9.00                   | -45.45                     | < 0.0001         | 86/98                    |                                                                             |                                                                   |                                                                                                    |                                                                                          |
|                 | <i>mir-7</i> ( <i>l4115</i> ); <i>odf-3p::mir-71</i>          | 21.00                  | 27.27                      | < 0.0001         | 94/101                   | 133.33                                                                      |                                                                   |                                                                                                    |                                                                                          |
|                 | <i>P60S::mir-71</i>                                           | 22.00                  | 33.33                      | < 0.0001         | 88/99                    |                                                                             | 4.76                                                              |                                                                                                    | 0.2823                                                                                   |
| 20°C            | Genotype                                                      | Median Lifespan (Days) | % increase median lifespan | Log Rank P Value | Total Animals Died/Total |                                                                             |                                                                   |                                                                                                    |                                                                                          |
| (exp. 1)        | WT                                                            | 11.00                  |                            |                  | 90/102                   |                                                                             |                                                                   |                                                                                                    |                                                                                          |
|                 | WTTM                                                          | 10.00                  | -9.09                      | 0.7964           | 92/105                   |                                                                             |                                                                   |                                                                                                    |                                                                                          |
|                 | <i>mir-7</i> ( <i>l4115</i> )                                 | 8.00                   | -20.00                     | 0.0001           | 72/90                    |                                                                             |                                                                   |                                                                                                    |                                                                                          |
|                 | <i>mir-7</i> ( <i>l4115</i> ); TM                             | 6.00                   | -25.00                     | < 0.0001         | 88/105                   |                                                                             |                                                                   |                                                                                                    |                                                                                          |
| (exp. 2)        | WT                                                            | 12.00                  |                            |                  | 89/111                   |                                                                             |                                                                   |                                                                                                    |                                                                                          |
|                 | WTTM                                                          | 11.00                  | -8.33                      | 0.0076           | 102/111                  |                                                                             |                                                                   |                                                                                                    |                                                                                          |
|                 | <i>mir-7</i> ( <i>l4115</i> )                                 | 9.00                   | -18.18                     | 0.0002           | 65/104                   |                                                                             |                                                                   |                                                                                                    |                                                                                          |
|                 | <i>mir-7</i> ( <i>l4115</i> ); TM                             | 7.00                   | -22.22                     | < 0.0001         | 94/117                   |                                                                             |                                                                   |                                                                                                    |                                                                                          |
| 20°C, 25uM FUDR | Genotype                                                      | Median Lifespan (Days) | % increase median lifespan | Log Rank P Value | Total Animals Died/Total |                                                                             |                                                                   |                                                                                                    |                                                                                          |
| (exp. 1)        | WT                                                            | 20.00                  |                            |                  | 88/100                   |                                                                             |                                                                   |                                                                                                    |                                                                                          |
|                 | <i>mir-7</i> ( <i>l4115</i> )                                 | 11.00                  | -45.00                     | < 0.0001         | 93/100                   |                                                                             |                                                                   |                                                                                                    |                                                                                          |
|                 | <i>tir-1</i> ( <i>ok2859</i> )                                | 17.00                  | -15.00                     | < 0.0001         | 91/99                    |                                                                             |                                                                   |                                                                                                    |                                                                                          |
|                 | <i>mir-7</i> ( <i>l4115</i> ); <i>tir-1</i> ( <i>ok2859</i> ) | 15.00                  | -25.00                     | < 0.0001         | 95/102                   | 36.36                                                                       |                                                                   | -11.76                                                                                             | 0.0001                                                                                   |
| (exp. 2)        | WT                                                            | 20.00                  |                            |                  | 93/99                    |                                                                             |                                                                   |                                                                                                    |                                                                                          |
|                 | <i>mir-7</i> ( <i>l4115</i> )                                 | 12.00                  | -40.00                     | < 0.0001         | 91/99                    |                                                                             |                                                                   |                                                                                                    |                                                                                          |
|                 | <i>tir-1</i> ( <i>ok2859</i> )                                | 17.00                  | -15.00                     | 0.0003           | 92/102                   |                                                                             |                                                                   |                                                                                                    |                                                                                          |
|                 | <i>mir-7</i> ( <i>l4115</i> ); <i>tir-1</i> ( <i>ok2859</i> ) | 14.00                  | -30.00                     | < 0.0001         | 96/101                   | 16.67                                                                       |                                                                   | -17.65                                                                                             | < 0.0001                                                                                 |
| 20°C            | Genotype                                                      | Median Lifespan (Days) | % increase median lifespan | Log Rank P Value | Total Animals Died/Total |                                                                             |                                                                   |                                                                                                    |                                                                                          |
| (exp. 1)        | WT                                                            | 19.00                  |                            |                  | 96/99                    |                                                                             |                                                                   |                                                                                                    |                                                                                          |
|                 | <i>tir-1</i> 3U/TR*                                           | 12.00                  | -36.84                     | < 0.0001         | 91/99                    |                                                                             |                                                                   |                                                                                                    |                                                                                          |
|                 | <i>tir-1</i> 3U/TR* + <i>tir-1</i> RNAi                       | 17.00                  | -10.53                     | 0.0009           | 97/100                   | 41.67                                                                       |                                                                   |                                                                                                    | < 0.0001                                                                                 |
| (exp. 2)        | WT                                                            | 19.00                  |                            |                  | 95/100                   |                                                                             |                                                                   |                                                                                                    |                                                                                          |
|                 | <i>tir-1</i> 3U/TR*                                           | 12.00                  | -36.84                     | < 0.0001         | 95/98                    |                                                                             |                                                                   |                                                                                                    |                                                                                          |
|                 | <i>tir-1</i> 3U/TR* + <i>tir-1</i> RNAi                       | 17.00                  | -10.53                     | 0.0006           | 94/100                   | 41.67                                                                       |                                                                   |                                                                                                    | < 0.0001                                                                                 |

## Supplementary Table 2

mRNAs regulated in amphid sensory neurons upon proteasomal stress and *mir-71(n4415)* deletion

| Ensembl ID     | gene symbol     | neuron type | RNA sequencing                          |          |                                         |          |                                              |          | microarray                                    |             |
|----------------|-----------------|-------------|-----------------------------------------|----------|-----------------------------------------|----------|----------------------------------------------|----------|-----------------------------------------------|-------------|
|                |                 |             | fold change<br>10 $\mu$ M Btz vs.<br>WT | p-value  | fold change<br>25 $\mu$ M Btz vs.<br>WT | p-value  | fold change<br><i>rpn-6.1</i> RNAi<br>vs. WT | p-value  | fold change<br><i>mir-71(n4415)</i><br>vs. WT | p-value     |
| WBGene00003856 | <i>odr-10</i>   | AWA         | n.s.                                    | n.s.     | 2,77                                    | 0,001685 | 2,98                                         | 0,000786 | -2,32                                         | 0,00243081  |
| WBGene00003000 | <i>lin-11</i>   | AWA         | n.s.                                    | n.s.     | 2,76                                    | 0        | 1,51                                         | 0,041323 | 2,73                                          | 0,00176989  |
| WBGene00002084 | <i>ins-1</i>    | AWA         | n.s.                                    | n.s.     | 1,57                                    | 0,016922 | 1,64                                         | 0,009464 | n.s.                                          | n.s.        |
| WBGene00003996 | <i>pgp-2</i>    | AWA         | -1,78                                   | 0        | -3,47                                   | 0        | -4,17                                        | 0        | n.s.                                          | n.s.        |
| WBGene00006109 | <i>str-44</i>   | AWB         | n.s.                                    | n.s.     | 4,58                                    | 0,015927 | 6,19                                         | 0,001763 | n.s.                                          | n.s.        |
| WBGene00000458 | <i>ceh-37</i>   | AWB         | n.s.                                    | n.s.     | 2,22                                    | 0,006025 | 1,66                                         | 0,007874 | 2,39                                          | 0,00534378  |
| WBGene00001129 | <i>dyf-13</i>   | AWB         | n.s.                                    | n.s.     | 2,18                                    | 0,010645 | 1,95                                         | 0,03587  | -1,62                                         | 0,00542693  |
| WBGene00017973 | <i>ift-81</i>   | AWB         | n.s.                                    | n.s.     | 1,70                                    | 0,019075 | 2,23                                         | 0,000342 | n.s.                                          | n.s.        |
| WBGene00003741 | <i>nlp-3</i>    | AWB         | n.s.                                    | n.s.     | 1,62                                    | 0,000242 | 1,51                                         | 0,001688 | -1,38                                         | 0,0178225   |
| WBGene00003747 | <i>nlp-9</i>    | AWB         | n.s.                                    | n.s.     | 1,50                                    | 0,000468 | 1,51                                         | 0,001966 | 2,92                                          | 0,000274251 |
| WBGene00001837 | <i>hda-4</i>    | AWB         | n.s.                                    | n.s.     | 1,21                                    | 0,013735 | 1,20                                         | 0,012942 | 2,91                                          | 0,00482287  |
| WBGene00003561 | <i>ncr-1</i>    | AWC         | 1,86                                    | 0,000139 | 3,35                                    | 0        | 1,37                                         | 0,039385 | 1,79                                          | 0,0137333   |
| WBGene00006575 | <i>tir-1</i>    | AWC         | 1,57                                    | 0,00001  | 2,91                                    | 0        | 3,10                                         | 0        | 1,77                                          | 0,000123714 |
| WBGene00010453 | <i>fozi-1</i>   | AWC         | n.s.                                    | n.s.     | 5,23                                    | 0        | 3,00                                         | 0,000054 | 1,74                                          | 0,0204151   |
| WBGene00016866 | <i>coel-1</i>   | AWC         | n.s.                                    | n.s.     | 3,81                                    | 0        | 1,89                                         | 0        | 1,48                                          | 0,00406593  |
| WBGene00010632 | <i>K07C5.9</i>  | AWC         | n.s.                                    | n.s.     | 2,01                                    | 0,001793 | 1,72                                         | 0,014334 | -2,14                                         | 0,00228023  |
| WBGene00003739 | <i>nlp-1</i>    | AWC         | n.s.                                    | n.s.     | 1,95                                    | 0,000355 | 1,55                                         | 0,0243   | n.s.                                          | n.s.        |
| WBGene00007260 | <i>olrn-1</i>   | AWC         | n.s.                                    | n.s.     | 1,52                                    | 0,000933 | 1,63                                         | 0,000119 | 2,76                                          | 0,000826669 |
| WBGene00001447 | <i>flp-4</i>    | AWC         | n.s.                                    | n.s.     | 1,43                                    | 0,018755 | 1,54                                         | 0,012192 | 1,27                                          | 0,0390078   |
| WBGene00019698 | <i>riok-1</i>   | AWC         | n.s.                                    | n.s.     | 1,36                                    | 0        | 1,49                                         | 0        | 1,25                                          | 0,0391208   |
| WBGene00010813 | <i>pitp-1</i>   | AWC         | n.s.                                    | n.s.     | 1,33                                    | 0,046276 | 1,32                                         | 0,037686 | 2,53                                          | 0,00347053  |
| WBGene00006742 | <i>unc-2</i>    | AWC         | n.s.                                    | n.s.     | 1,32                                    | 0,041702 | 1,36                                         | 0,022473 | 1,93                                          | 8,46742E-06 |
| WBGene00022599 | <i>ZC395.10</i> | AWC         | n.s.                                    | n.s.     | -1,92                                   | 0        | -1,31                                        | 0,000215 | -1,11                                         | 0,0478619   |
| WBGene00003511 | <i>mxl-3</i>    | AWC         | n.s.                                    | n.s.     | -2,53                                   | 0,0001   | -3,46                                        | 0        | n.s.                                          | n.s.        |
| WBGene00002118 | <i>ins-35</i>   | AWC         | n.s.                                    | n.s.     | -8,32                                   | 0,002031 | -7,84                                        | 0,001585 | n.s.                                          | n.s.        |
| WBGene00001173 | <i>egl-4</i>    | AWC         | -1,15                                   | 0,000524 | -1,62                                   | 0        | -1,46                                        | 0        | 1,68                                          | 0,00804379  |
| WBGene00001996 | <i>hpl-2</i>    | AWC         | -1,14                                   | 0,04841  | -1,82                                   | 0        | -1,23                                        | 0,004517 | n.s.                                          | n.s.        |
| WBGene00019900 | <i>vdac-1</i>   | AWC         | -1,42                                   | 0        | -2,82                                   | 0        | -2,04                                        | 0        | n.s.                                          | n.s.        |
| WBGene00000457 | <i>ceh-36</i>   | AWC         | -5,08                                   | 0,000454 | -8,12                                   | 0,000291 | -2,63                                        | 0,037317 | 3,90                                          | 0,00266951  |
| WBGene00003629 | <i>nhr-38</i>   | AFD         | n.s.                                    | n.s.     | 4,79                                    | 0,006025 | 3,52                                         | 0,048148 | -1,44                                         | 0,0436177   |
| WBGene00001548 | <i>gcy-23</i>   | AFD         | n.s.                                    | n.s.     | 2,91                                    | 0,000241 | 1,93                                         | 0,025811 | n.s.                                          | n.s.        |
| WBGene00016328 | <i>pde-5</i>    | AFD         | n.s.                                    | n.s.     | 2,50                                    | 0,028109 | 2,66                                         | 0,029989 | n.s.                                          | n.s.        |
| WBGene00001449 | <i>flp-6</i>    | AFD         | n.s.                                    | n.s.     | 1,77                                    | 0        | 1,51                                         | 0        | 1,15                                          | 0,00893673  |
| WBGene00003759 | <i>nlp-21</i>   | AFD         | n.s.                                    | n.s.     | 1,64                                    | 0,00003  | 1,37                                         | 0,019334 | n.s.                                          | n.s.        |
| WBGene00020317 | <i>pdf-1</i>    | AFD         | n.s.                                    | n.s.     | 1,32                                    | 0,000291 | 1,52                                         | 0        | n.s.                                          | n.s.        |
| WBGene00011564 | <i>ugt-50</i>   | AFD         | n.s.                                    | n.s.     | -1,49                                   | 0,0062   | -1,88                                        | 0,000026 | n.s.                                          | n.s.        |
| WBGene00003423 | <i>msi-1</i>    | AFD         | -1,40                                   | 0,000342 | -1,54                                   | 0,000005 | -1,28                                        | 0,010516 | 2,23                                          | 0,000769833 |

## Supplementary Table 3

RNA-sequencing/Microarray data for potential *mir-71* targets upon proteotoxic stress

| Ensembl ID     | gene symbol   | neuron type | RNA sequencing                           |          |                                               |          |                                                |          |                                   |         |                                   |          | microarray                            |          |                                                |             |
|----------------|---------------|-------------|------------------------------------------|----------|-----------------------------------------------|----------|------------------------------------------------|----------|-----------------------------------|---------|-----------------------------------|----------|---------------------------------------|----------|------------------------------------------------|-------------|
|                |               |             | fold change<br>25µM<br>Cadmium vs.<br>WT | p-value  | fold change<br>200µM<br>Cantharidin vs.<br>WT | p-value  | fold change<br>200µM<br>Fluphenazine<br>vs. WT | p-value  | fold change<br>10µM Btz vs.<br>WT | p-value | fold change<br>25µM Btz vs.<br>WT | p-value  | fold change<br>rpr-6.1 RNAI<br>vs. WT | p-value  | fold change<br><i>mir-71</i> (n4115)<br>vs. WT | p-value     |
| WBGene00006575 | <i>thr-1</i>  | AWC         | 1.59                                     | 0        | 3.56                                          | 0        | 2.33                                           | 0.00001  | 1.57                              | 0.00001 | 2.91                              | 0        | 3.10                                  | 0        | 1.77                                           | 0.000123714 |
| WBGene00019698 | <i>riak-1</i> | AWC         | -1.21                                    | 0.024451 | n.s.                                          | n.s.     | n.s.                                           | n.s.     | n.s.                              | n.s.    | 1.36                              | 0        | 1.49                                  | 0        | 1.25                                           | 0.0391208   |
| WBGene00010813 | <i>pltp-1</i> | AWC         | n.s.                                     | n.s.     | n.s.                                          | n.s.     | n.s.                                           | n.s.     | n.s.                              | n.s.    | 1.33                              | 0.046276 | 1.32                                  | 0.037686 | 2.53                                           | 0.00347053  |
| WBGene00006742 | <i>unc-2</i>  | AWC         | n.s.                                     | n.s.     | 1.41                                          | 0.019391 | 1.47                                           | 0.027061 | n.s.                              | n.s.    | 1.32                              | 0.041702 | 1.36                                  | 0.022473 | 1.93                                           | 8.46742E-06 |

## Supplementary Table 4

Neuropeptide mRNAs regulated upon *mir-71(n4115)* deletion

### insulin-like peptides

| gene symbol   | fold change( <i>mir-71(n4115)</i> vs. WT) | p-value  |
|---------------|-------------------------------------------|----------|
| <i>ins-2</i>  | -2,2646                                   | 0,004975 |
| <i>ins-5</i>  | 1,8976                                    | 0,001525 |
| <i>ins-10</i> | -2,2401                                   | 0,005381 |
| <i>ins-12</i> | -3,1031                                   | 0,000113 |
| <i>ins-24</i> | 2,0026                                    | 0,000179 |
| <i>ins-31</i> | -4,6013                                   | 0,003063 |
| <i>ins-33</i> | -2,0609                                   | 0,002678 |
| <i>ins-34</i> | -2,8311                                   | 0,000204 |

### FRMF-like peptides

| gene symbol   | fold change( <i>mir-71(n4115)</i> vs. WT) | p-value  |
|---------------|-------------------------------------------|----------|
| <i>flp-3</i>  | 1,5704                                    | 0,000391 |
| <i>flp-8</i>  | -1,6706                                   | 0,007151 |
| <i>flp-12</i> | -1,8135                                   | 0,003158 |
| <i>flp-15</i> | -2,0221                                   | 0,003966 |
| <i>flp-16</i> | 1,6139                                    | 0,002402 |
| <i>flp-17</i> | -2,0482                                   | 0,002479 |
| <i>flp-22</i> | -2,2135                                   | 0,003794 |
| <i>flp-24</i> | -2,0124                                   | 0,006178 |

### neuropeptide-like proteins

| gene symbol   | fold change( <i>mir-71(n4115)</i> vs. WT) | p-value  |
|---------------|-------------------------------------------|----------|
| <i>nlp-4</i>  | -1,9161                                   | 0,000829 |
| <i>nlp-5</i>  | -2,9974                                   | 0,000056 |
| <i>nlp-9</i>  | 2,9161                                    | 0,000274 |
| <i>nlp-13</i> | 1,7180                                    | 0,001724 |
| <i>nlp-14</i> | 2,3555                                    | 0,000402 |
| <i>nlp-17</i> | -1,8117                                   | 0,001413 |
| <i>nlp-20</i> | -1,8869                                   | 0,009217 |
| <i>nlp-25</i> | -4,4854                                   | 0,000144 |
| <i>nlp-26</i> | -1,5791                                   | 0,006250 |
| <i>nlp-27</i> | -2,3196                                   | 0,001470 |
| <i>nlp-28</i> | -3,0186                                   | 0,000266 |
| <i>nlp-29</i> | -4,5787                                   | 0,002695 |
| <i>nlp-30</i> | -5,2101                                   | 0,006844 |
| <i>nlp-33</i> | -1,7984                                   | 0,000068 |
| <i>nlp-34</i> | -2,5120                                   | 0,006185 |
| <i>nlp-40</i> | -1,6439                                   | 0,000759 |

Affymetrix EleGene-1\_0-st-v1.na34.ce6

≥ 1.5 fold change, p-value ≤ 0,01

## Supplementary Table 5

Summary of chemotaxis experiments (part 1)

Statistical analysis was done via one-way ANOVA with post-hoc test for multiple comparison

|          | Genotype                             | excluded | # animals LB medium (control) | # animals OP50 (test) | # total animals | Chemotaxis Index (CI) |
|----------|--------------------------------------|----------|-------------------------------|-----------------------|-----------------|-----------------------|
| (exp. 1) | WT                                   | 8        | 26                            | 56                    | 90              | 0,333                 |
|          | <i>mir-71(n4115)</i>                 | 4        | 57                            | 65                    | 126             | 0,063                 |
|          | <i>mir-71(n4115); Podr-3::mir-71</i> | 21       | 19                            | 64                    | 104             | 0,433                 |
|          | <i>mir-71(n4115); Pstr-1::mir-71</i> | 12       | 87                            | 114                   | 213             | 0,127                 |
|          | <i>tir-1 3'UTR*</i>                  | 21       | 62                            | 91                    | 174             | 0,167                 |
|          | <i>odr-3(n1605)</i>                  | 30       | 19                            | 17                    | 66              | -0,030                |
| (exp. 2) | WT                                   | 8        | 62                            | 88                    | 158             | 0,165                 |
|          | <i>mir-71(n4115)</i>                 | 3        | 49                            | 53                    | 105             | 0,038                 |
|          | <i>mir-71(n4115); Podr-3::mir-71</i> | 8        | 77                            | 134                   | 219             | 0,110                 |
|          | <i>mir-71(n4115); Pstr-1::mir-71</i> | 9        | 85                            | 109                   | 203             | 0,118                 |
|          | <i>tir-1 3'UTR*</i>                  | 58       | 101                           | 107                   | 266             | 0,023                 |
|          | <i>odr-3(n1605)</i>                  | 45       | 21                            | 18                    | 84              | -0,036                |
| (exp. 3) | WT                                   | 23       | 49                            | 75                    | 147             | 0,177                 |
|          | <i>mir-71(n4115)</i>                 | 7        | 78                            | 93                    | 178             | 0,084                 |
|          | <i>mir-71(n4115); Podr-3::mir-71</i> | 23       | 98                            | 165                   | 286             | 0,234                 |
|          | <i>mir-71(n4115); Pstr-1::mir-71</i> | 9        | 95                            | 148                   | 252             | 0,210                 |
|          | <i>tir-1 3'UTR*</i>                  | 16       | 35                            | 58                    | 109             | 0,211                 |
|          | <i>odr-3(n1605)</i>                  | 38       | 27                            | 22                    | 87              | -0,057                |
| (exp. 4) | WT                                   | 37       | 57                            | 113                   | 207             | 0,271                 |
|          | <i>mir-71(n4115)</i>                 | 64       | 123                           | 136                   | 323             | 0,040                 |
|          | <i>mir-71(n4115); Podr-3::mir-71</i> | 29       | 103                           | 155                   | 287             | 0,181                 |
|          | <i>mir-71(n4115); Pstr-1::mir-71</i> | 63       | 82                            | 91                    | 236             | 0,038                 |
|          | <i>tir-1 3'UTR*</i>                  | 58       | 202                           | 174                   | 434             | -0,065                |
|          | <i>odr-3(n1605)</i>                  | 97       | 28                            | 15                    | 140             | -0,093                |
| (exp. 5) | WT                                   | 42       | 53                            | 101                   | 196             | 0,245                 |
|          | <i>mir-71(n4115)</i>                 | 28       | 76                            | 96                    | 200             | 0,100                 |
|          | <i>mir-71(n4115); Podr-3::mir-71</i> | 32       | 73                            | 146                   | 251             | 0,291                 |
|          | <i>mir-71(n4115); Pstr-1::mir-71</i> | 44       | 93                            | 107                   | 244             | 0,057                 |
|          | <i>tir-1 3'UTR*</i>                  | 93       | 162                           | 199                   | 454             | 0,081                 |
|          | <i>odr-3(n1605)</i>                  | 144      | 16                            | 11                    | 171             | -0,029                |
| (exp. 6) | WT                                   | 46       | 46                            | 96                    | 188             | 0,266                 |
|          | <i>mir-71(n4115)</i>                 | 57       | 89                            | 109                   | 255             | 0,078                 |
|          | <i>mir-71(n4115); Podr-3::mir-71</i> | 35       | 52                            | 93                    | 180             | 0,228                 |
|          | <i>mir-71(n4115); Pstr-1::mir-71</i> | 51       | 68                            | 72                    | 191             | 0,021                 |
|          | <i>tir-1 3'UTR*</i>                  | 108      | 216                           | 265                   | 589             | 0,083                 |
|          | <i>odr-3(n1605)</i>                  | 168      | 16                            | 16                    | 200             | 0,000                 |
| (exp. 7) | WT                                   | 11       | 110                           | 158                   | 279             | 0,172                 |
|          | <i>mir-71(n4115)</i>                 | 9        | 94                            | 121                   | 224             | 0,121                 |
|          | <i>mir-71(n4115); Podr-3::mir-71</i> | 9        | 87                            | 120                   | 216             | 0,153                 |
|          | <i>mir-71(n4115); Pstr-1::mir-71</i> | 31       | 87                            | 112                   | 230             | 0,109                 |
|          | <i>tir-1 3'UTR*</i>                  | 15       | 95                            | 151                   | 261             | 0,215                 |
|          | <i>odr-3(n1605)</i>                  | 59       | 66                            | 80                    | 205             | 0,068                 |
| (exp. 8) | WT                                   | 14       | 74                            | 128                   | 216             | 0,250                 |
|          | <i>mir-71(n4115)</i>                 | 12       | 150                           | 162                   | 324             | 0,037                 |
|          | <i>mir-71(n4115); Podr-3::mir-71</i> | 18       | 103                           | 162                   | 283             | 0,208                 |
|          | <i>mir-71(n4115); Pstr-1::mir-71</i> | 35       | 145                           | 192                   | 372             | 0,126                 |
|          | <i>tir-1 3'UTR*</i>                  | 31       | 111                           | 153                   | 295             | 0,142                 |
|          | <i>odr-3(n1605)</i>                  | 45       | 52                            | 49                    | 146             | -0,021                |
| (exp. 9) | WT                                   | 19       | 90                            | 171                   | 280             | 0,289                 |
|          | <i>mir-71(n4115)</i>                 | 11       | 127                           | 170                   | 308             | 0,140                 |
|          | <i>mir-71(n4115); Podr-3::mir-71</i> | 3        | 70                            | 96                    | 169             | 0,154                 |
|          | <i>mir-71(n4115); Pstr-1::mir-71</i> | 26       | 121                           | 146                   | 293             | 0,085                 |
|          | <i>tir-1 3'UTR*</i>                  | 22       | 118                           | 139                   | 279             | 0,075                 |
|          | <i>odr-3(n1605)</i>                  | 62       | 76                            | 41                    | 179             | -0,196                |

| Genotype                             | mean Chemotaxis Index | ± Standard deviation (SD) | ± Standard error (SEM) | p Value compared to WT |
|--------------------------------------|-----------------------|---------------------------|------------------------|------------------------|
| WT                                   | 0,241                 | 0,058                     | 0,019                  |                        |
| <i>mir-71(n4115)</i>                 | 0,078                 | 0,037                     | 0,012                  | 0,0001                 |
| <i>mir-71(n4115); Podr-3::mir-71</i> | 0,221                 | 0,096                     | 0,032                  | 0,9999                 |
| <i>mir-71(n4115); Pstr-1::mir-71</i> | 0,099                 | 0,057                     | 0,019                  | 0,0004                 |
| <i>tir-1 3'UTR*</i>                  | 0,104                 | 0,091                     | 0,030                  | 0,0006                 |
| <i>odr-3(n1605)</i>                  | -0,044                | 0,072                     | 0,024                  | 0,0001                 |

## Supplementary Table 5

Summary of chemotaxis experiments (part 2)

Statistical analysis was done via one-way ANOVA with post-hoc test for multiple comparison

|          | Genotype                             | excluded | # animals LB medium (control) | # animals OP50 (test) | # total animals | Chemotaxis Index (CI) |
|----------|--------------------------------------|----------|-------------------------------|-----------------------|-----------------|-----------------------|
| (exp. 1) | WT                                   | 42       | 101                           | 118                   | 261             | 0,065                 |
|          | <i>tir-1(ok 2859)</i>                | 52       | 66                            | 54                    | 172             | -0,070                |
|          | <i>tir-1(ok 2859); Podr-3::tir-1</i> | 80       | 46                            | 65                    | 191             | 0,099                 |
|          | <i>tir-1(ok 2859); Pnhx-2::tir-1</i> | 43       | 24                            | 20                    | 87              | -0,046                |
| (exp. 2) | WT                                   | 50       | 121                           | 147                   | 318             | 0,082                 |
|          | <i>tir-1(ok 2859)</i>                | 49       | 91                            | 93                    | 233             | 0,009                 |
|          | <i>tir-1(ok 2859); Podr-3::tir-1</i> | 64       | 41                            | 52                    | 157             | 0,070                 |
|          | <i>tir-1(ok 2859); Pnhx-2::tir-1</i> | 38       | 26                            | 28                    | 92              | 0,022                 |
| (exp. 3) | WT                                   | 65       | 98                            | 128                   | 291             | 0,103                 |
|          | <i>tir-1(ok 2859)</i>                | 34       | 77                            | 69                    | 180             | -0,044                |
|          | <i>tir-1(ok 2859); Podr-3::tir-1</i> | 79       | 26                            | 45                    | 150             | 0,127                 |
|          | <i>tir-1(ok 2859); Pnhx-2::tir-1</i> | 39       | 24                            | 17                    | 80              | -0,088                |
| (exp. 4) | WT                                   | 66       | 104                           | 153                   | 323             | 0,152                 |
|          | <i>tir-1(ok 2859)</i>                | 32       | 61                            | 57                    | 150             | -0,027                |
|          | <i>tir-1(ok 2859); Podr-3::tir-1</i> | 95       | 22                            | 40                    | 157             | 0,115                 |
|          | <i>tir-1(ok 2859); Pnhx-2::tir-1</i> | 35       | 25                            | 29                    | 89              | 0,045                 |
| (exp. 5) | WT                                   | 67       | 92                            | 145                   | 304             | 0,174                 |
|          | <i>tir-1(ok 2859)</i>                | 32       | 72                            | 66                    | 170             | -0,035                |
|          | <i>tir-1(ok 2859); Podr-3::tir-1</i> | 82       | 37                            | 43                    | 162             | 0,037                 |
|          | <i>tir-1(ok 2859); Pnhx-2::tir-1</i> | 65       | 19                            | 21                    | 105             | 0,019                 |
| (exp. 6) | WT                                   | 52       | 96                            | 122                   | 270             | 0,096                 |
|          | <i>tir-1(ok 2859)</i>                | 34       | 60                            | 46                    | 140             | -0,100                |
|          | <i>tir-1(ok 2859); Podr-3::tir-1</i> | 103      | 37                            | 49                    | 189             | 0,063                 |
|          | <i>tir-1(ok 2859); Pnhx-2::tir-1</i> | 63       | 24                            | 23                    | 110             | -0,009                |
| (exp. 7) | WT                                   | 10       | 84                            | 112                   | 206             | 0,136                 |
|          | <i>tir-1(ok 2859)</i>                | 50       | 124                           | 129                   | 303             | 0,017                 |
|          | <i>tir-1(ok 2859); Podr-3::tir-1</i> | 73       | 42                            | 62                    | 177             | 0,113                 |
|          | <i>tir-1(ok 2859); Pnhx-2::tir-1</i> | 100      | 38                            | 41                    | 179             | 0,017                 |
| (exp. 8) | WT                                   | 17       | 83                            | 119                   | 219             | 0,164                 |
|          | <i>tir-1(ok 2859)</i>                | 29       | 149                           | 141                   | 319             | -0,025                |
|          | <i>tir-1(ok 2859); Podr-3::tir-1</i> | 64       | 48                            | 79                    | 191             | 0,162                 |
|          | <i>tir-1(ok 2859); Pnhx-2::tir-1</i> | 92       | 42                            | 39                    | 173             | -0,017                |
| (exp. 9) | WT                                   | 27       | 106                           | 163                   | 296             | 0,193                 |
|          | <i>tir-1(ok 2859)</i>                | 41       | 144                           | 154                   | 339             | 0,029                 |
|          | <i>tir-1(ok 2859); Podr-3::tir-1</i> | 64       | 57                            | 78                    | 199             | 0,106                 |
|          | <i>tir-1(ok 2859); Pnhx-2::tir-1</i> | 71       | 46                            | 51                    | 168             | 0,030                 |

| Genotype                             | mean Chemotaxis Index | ± Standard deviation (SD) | ± Standard error (SEM) | p Value compared to WT |
|--------------------------------------|-----------------------|---------------------------|------------------------|------------------------|
| WT                                   | 0,129                 | 0,045                     | 0,015                  |                        |
| <i>tir-1(ok 2859)</i>                | -0,027                | 0,042                     | 0,014                  | 0,0001                 |
| <i>tir-1(ok 2859); Podr-3::tir-1</i> | 0,099                 | 0,037                     | 0,012                  | 0,2981                 |
| <i>tir-1(ok 2859); Pnhx-2::tir-1</i> | -0,003                | 0,042                     | 0,014                  | 0,0001                 |

## Supplementary Table 6

*C. elegans* strains used in this study

| Strain name                                                                                                                     | Origin               | Resource                   |
|---------------------------------------------------------------------------------------------------------------------------------|----------------------|----------------------------|
| <i>C. elegans</i> : Bristol (N2) strain as wild-type (WT)                                                                       | CGC                  | Wormbase ID: N2            |
| <i>C. elegans</i> : <i>unc-119(ed4)III</i> ;<br><i>hhIs64[unc-119(+); Psur-5::UbV-GFP]III</i>                                   | Segref et al., 2011  | N/A                        |
| <i>C. elegans</i> : <i>hhIs113[Pnhx-2::cpl-1<sup>W32AW35A</sup>::yfp</i> ;<br><i>Pmyo-2::mCherryI</i>                           | Hoppe Lab            | N/A                        |
| <i>C. elegans</i> : <i>hsf-1(sy441)I</i>                                                                                        | CGC                  | Wormbase ID: WBVar00248994 |
| <i>C. elegans</i> : <i>hhIs111[Pnhx-2::cpl-1<sup>W32AW35A</sup>::gfp]II</i> ;<br><i>sqt-3(sc8) sel-1(e1948)V</i>                | Hoppe Lab            | N/A                        |
| <i>C. elegans</i> : <i>hhIs64[unc-119(+); Psur-5::UbV-GFP]III</i> ;<br><i>hecd-1(tm2371)IV</i>                                  | Segref et al. , 2011 | N/A                        |
| <i>C. elegans</i> : <i>hhIs64[unc-119(+); Psur-5::UbV-GFP]III</i> ;<br><i>mir-84(n4037)X</i>                                    | This study           | N/A                        |
| <i>C. elegans</i> : <i>hhIs64[unc-119(+); Psur-5::UbV-GFP]III</i> ;<br><i>mir-124(n4255)IV</i>                                  | This study           | N/A                        |
| <i>C. elegans</i> : <i>hhIs64[unc-119(+); Psur-5::UbV-GFP]III</i> ;<br><i>mir-34(n4276)X</i>                                    | This study           | N/A                        |
| <i>C. elegans</i> : <i>hhIs64[unc-119(+);Psur-5::UbV-GFP]III</i> ;<br><i>mir-241(n4316)V</i>                                    | This study           | N/A                        |
| <i>C. elegans</i> : <i>hhIs64[unc-119(+);Psur-5::UbV-GFP]III</i> ; <i>mir-71(n4115)I</i>                                        | This study           | N/A                        |
| <i>C. elegans</i> : <i>hhIs64[unc-119(+);Psur-5::UbV-GFP]III</i> ; <i>mir-48(n4097)V</i>                                        | This study           | N/A                        |
| <i>C. elegans</i> : <i>hhIs113[Pnhx-2::cpl-1<sup>W32AW35A</sup>::yfp</i> ;<br><i>Pmyo-2::mCherryI</i> ; <i>mir-241(n4316)V</i>  | This study           | N/A                        |
| <i>C. elegans</i> : <i>hhIs113[Pnhx-2::cpl-1<sup>W32AW35A</sup>::yfp</i> ;<br><i>Pmyo-2::mCherryI</i> ; <i>mir-124(n4255)IV</i> | This study           | N/A                        |
| <i>C. elegans</i> : <i>hhIs113[Pnhx-2::cpl-1<sup>W32AW35A</sup>::yfp</i> ;<br><i>Pmyo-2::mCherryI</i> ; <i>mir-34(n4276)X</i>   | This study           | N/A                        |
| <i>C. elegans</i> : <i>hhIs113[Pnhx-2::cpl-1<sup>W32AW35A</sup>::yfp</i> ;<br><i>Pmyo-2::mCherryI</i> ; <i>mir-71(n4115)I</i>   | This study           | N/A                        |



| Strain name                                                                                                                                                                                                    | Origin              | Resource                   |
|----------------------------------------------------------------------------------------------------------------------------------------------------------------------------------------------------------------|---------------------|----------------------------|
| <i>C. elegans</i> : <i>hhIs113</i> [ <i>Pnhx-2::cpl-1</i> <sup>W32AW35A</sup> :: <i>yfp</i> ;<br><i>Pmyo-2::mCherry</i> ]; <i>lin-58</i> & <i>mir-241</i> ( <i>nDf51</i> ) <i>V</i>                            | This study          | N/A                        |
| <i>C. elegans</i> : <i>mir-71</i> ( <i>n4115</i> ) <i>I</i>                                                                                                                                                    | CGC                 | Wormbase ID: WBVar00090803 |
| <i>C. elegans</i> : <i>unc-119</i> ( <i>ed4</i> ) <i>III</i> ;<br><i>hhIs64</i> [ <i>unc-119</i> (+); <i>Psur-5::UbV-GFP</i> ] <i>III</i> ;<br><i>uthEx556</i> [ <i>Psur-5::rpn-6.1</i> ; <i>Pmyo-3::GFP</i> ] | Hoppe lab           | N/A                        |
| <i>C. elegans</i> : <i>mir-71</i> ( <i>n4115</i> ) <i>I</i> ;<br><i>uthEx556</i> [ <i>Psur-5::rpn-6.1</i> ; <i>Pmyo-3::GFP</i> ]; <i>hhIs64</i> [ <i>unc-119</i> (+); <i>Psur-5::UbV-GFP</i> ] <i>III</i>      | This study          | N/A                        |
| <i>C. elegans</i> : <i>hecd-1</i> ( <i>tm2371</i> ) <i>IV</i> ;<br><i>uthEx556</i> [ <i>Psur-5::rpn-6.1</i> ; <i>Pmyo-3::GFP</i> ]; <i>hhIs64</i> [ <i>unc-119</i> (+); <i>Psur-5::UbV-GFP</i> ] <i>III</i>    | This study          | N/A                        |
| <i>C. elegans</i> : <i>hhIs53</i> [ <i>unc-119</i> (+); <i>Psur-5::K29/48R-UbV-GFP</i> ]                                                                                                                       | Segref et al., 2011 | N/A                        |
| <i>C. elegans</i> : <i>mir-71</i> ( <i>n4115</i> ) <i>I</i> ; <i>hhIs53</i> [ <i>unc-119</i> (+); <i>Psur-5::K29/48R-UbV-GFP</i> ] <i>III</i>                                                                  | This study          | N/A                        |
| <i>C. elegans</i> : <i>hhIs57</i> [ <i>unc-119</i> (+); <i>Psur-5::GFP</i> ] <i>III</i>                                                                                                                        | Segref et al., 2011 | N/A                        |
| <i>C. elegans</i> : <i>mir-71</i> ( <i>n4115</i> ) <i>I</i> ; <i>hhIs57</i> [ <i>unc-119</i> (+); <i>Psur-5::GFP</i> ] <i>III</i>                                                                              | This study          | N/A                        |
| <i>C. elegans</i> : <i>mir-71</i> ( <i>n4115</i> ) <i>I</i> ;<br><i>hhIs64</i> [ <i>unc-119</i> (+); <i>Psur-5::UbV-GFP</i> ] <i>III</i> ;<br><i>nEx1802</i> [ <i>Prpl-28::mir-71 + pRF4</i> ]                 | This study          | N/A                        |
| <i>C. elegans</i> : <i>mir-71</i> ( <i>n4115</i> ) <i>I</i> ;<br><i>hhIs64</i> [ <i>unc-119</i> (+); <i>Psur-5::UbV-GFP</i> ] <i>III</i> ;<br><i>nEx1823</i> [ <i>Punc-119::mir-71 + pRF4</i> ]                | This study          | N/A                        |
| <i>C. elegans</i> : <i>mir-71</i> ( <i>n4115</i> ) <i>I</i> ;<br><i>hhIs64</i> [ <i>unc-119</i> (+); <i>Psur-5::UbV-GFP</i> ] <i>III</i> ;<br><i>nEx1825</i> [ <i>Prab-3::mir-71 + pRF4</i> ]                  | This study          | N/A                        |
| <i>C. elegans</i> : <i>mir-71</i> ( <i>n4115</i> ) <i>I</i> ;<br><i>hhIs64</i> [ <i>unc-119</i> (+); <i>Psur-5::UbV-GFP</i> ] <i>III</i> ;<br><i>nEx1805</i> [ <i>Pdpy-7::mir-71 + pRF4</i> ]                  | This study          | N/A                        |
| <i>C. elegans</i> : <i>unc-13</i> ( <i>e51</i> ) <i>I</i> ;<br><i>hhIs64</i> [ <i>unc-119</i> (+); <i>Psur-5::UbV-GFP</i> ] <i>III</i>                                                                         | This study          | N/A                        |
| <i>C. elegans</i> : <i>mir-71</i> ( <i>n4115</i> ) <i>I</i> ; <i>unc-13</i> ( <i>e51</i> ) <i>I</i> ;<br><i>hhIs64</i> [ <i>unc-119</i> (+); <i>Psur-5::UbV-GFP</i> ] <i>III</i>                               | This study          |                            |
| <i>C. elegans</i> : <i>unc-31</i> ( <i>e169</i> ) <i>IV</i> ; <i>hhIs64</i> [ <i>unc-119</i> (+); <i>Psur-5::UbV-GFP</i> ] <i>III</i>                                                                          | This study          | N/A                        |
| <i>C. elegans</i> : <i>mir-71</i> ( <i>n4115</i> ) <i>I</i> ; <i>unc-31</i> ( <i>e169</i> ) <i>IV</i> ; <i>hhIs64</i> [ <i>unc-119</i> (+); <i>Psur-5::UbV-GFP</i> ] <i>III</i>                                | This study          |                            |

| Strain name                                                                                                                                                 | Origin     | Resource                   |
|-------------------------------------------------------------------------------------------------------------------------------------------------------------|------------|----------------------------|
| <i>C. elegans</i> : <i>oyls44[odr-1::RFP]V</i>                                                                                                              | CGC        | Wormbase ID: PY2417        |
| <i>C. elegans</i> : <i>oyls44[odr-1::RFP]V</i> ;<br><i>mals352[unc-119(+)] + Pmir-71::GFP</i>                                                               | This study | N/A                        |
| <i>C. elegans</i> : <i>luc51[tir-1::gfp]</i> ; <i>oyls44[odr-1::RFP]V</i>                                                                                   | This study | N/A                        |
| <i>C. elegans</i> : <i>mir-71(n4115)I</i> ; <i>oyls44[odr-1::RFP]V</i>                                                                                      | This study |                            |
| <i>C. elegans</i> : <i>mir-71(n4115)I</i> ;<br><i>hhls64[unc-119(+); Psur-5::UbV-GFP]III</i> ;<br><i>hhls172[Podr-3::mir-71; Pofm-1::DsRed]</i>             | This study | N/A                        |
| <i>C. elegans</i> : <i>mir-71(n4115)I</i> ;<br><i>hhls64[unc-119(+); Psur-5::UbV-GFP]III</i> ;<br><i>hhls173[Podr-3::mir-71; Pofm-1::DsRed]</i>             | This study | N/A                        |
| <i>C. elegans</i> : <i>hhls64[unc-119(+); Psur-5::UbV-GFP]III</i> ; <i>hhls172[Podr-3::mir-71; Pofm-1::DsRed]</i>                                           | This study | N/A                        |
| <i>C. elegans</i> : <i>tir-1(ok2859)III</i> ;<br><i>hhls64[unc-119(+); Psur-5::UbV-GFP]III</i>                                                              | This study | N/A                        |
| <i>C. elegans</i> : <i>mir-71(n4115)I</i> ; <i>tir-1(ok2859)III</i> ;<br><i>hhls64[unc-119(+); Psur-5::UbV-GFP]III</i>                                      | This study | N/A                        |
| <i>C. elegans</i> : <i>hhls113</i><br><i>[Pnhx-2::cpl-1<sup>W32AW35A</sup>::yfp</i> ;<br><i>Pmyo-2::mCherry]I</i> ; <i>tir-1(ok2859)III</i>                 | This study | N/A                        |
| <i>C. elegans</i> : <i>mir-71(n4115)I</i> ;<br><i>hhls113[Pnhx-2::cpl-1<sup>W32AW35A</sup>::yfp</i> ;<br><i>Pmyo-2::mCherry]I</i> ; <i>tir-1(ok2859)III</i> | This study | N/A                        |
| <i>C. elegans</i> : <i>tir-1(ok2859)III</i>                                                                                                                 | CGC        | Wormbase ID: WBVar00093954 |
| <i>C. elegans</i> : <i>mir-71(n4115)I</i> ; <i>tir-1(ok2859)III</i>                                                                                         | This study | N/A                        |
| <i>C. elegans</i> : <i>tir-1(ok2859)III</i> ; <i>hhls53[unc-119(+); Psur-5::K29/48R-UbV-GFP]</i>                                                            | This study | N/A                        |
| <i>C. elegans</i> : <i>tir-1(ok2859)III</i> ; <i>unc-119(ed4)III</i> ;<br><i>hhls57[unc-119(+); Psur-5::GFP]</i>                                            | This study | N/A                        |
| <i>C. elegans</i> : <i>hhls64[unc-119(+); Psur-5::UbV-GFP]III</i> ;<br><i>tir-1(yz68)III</i>                                                                | This study | N/A                        |
| <i>C. elegans</i> : <i>mir-71(n4115)I</i> ; <i>hhls64[unc-119(+); Psur-5::UbV-GFP]III</i> ; <i>tir-1(yz68)III</i>                                           | This study | N/A                        |
| <i>C. elegans</i> : <i>luc56[tir-1-3UTRmod]III</i>                                                                                                          | This study | MLC878                     |
| <i>C. elegans</i> : <i>luc56[tir-1-3UTRmod]III</i> ;<br><i>hhls64 [unc-119(+); Psur-5::UbV-GFP]III</i>                                                      | This study | N/A                        |

| Strain name                                                                                                                                                                | Origin     | Resource                   |
|----------------------------------------------------------------------------------------------------------------------------------------------------------------------------|------------|----------------------------|
| <i>C. elegans</i> : <i>hhIs113</i><br>[ <i>Pnhx-2::cpl-1W32AW35A::yfp</i> ;<br><i>Pmyo-2::mCherry</i> ]; <i>luc56[tir-1-3UTRmod]III</i>                                    | This study | N/A                        |
| <i>C. elegans</i> : <i>luc56[tir-1-3UTRmod]III</i> ;<br><i>hhIs64 [unc-119(+); Psur-5::UbV-GFP]III</i><br>; <i>uthEx556[Psur-5::rpn-6.1; Pmyo-3::GFP]</i>                  | This study | N/A                        |
| <i>C. elegans</i> : <i>unc-13(e51)</i> ; <i>luc56[tir-1-3UTRmod]III</i> ; <i>hhIs64 [unc-119(+); Psur-5::UbV-GFP]III</i>                                                   | This study | N/A                        |
| <i>C. elegans</i> : <i>luc56[tir-1-3UTRmod]III</i> ;<br><i>hhIs64 [unc-119(+); Psur-5::UbV-GFP]III</i> ;<br><i>unc-31(e169)IV</i>                                          | This study | N/A                        |
| <i>C. elegans</i> : <i>luc56[tir-1-3UTRmod]III</i> ;<br><i>hhIs64 [unc-119(+); Psur-5::UbV-GFP]III</i> ;<br><i>hhIs172[Podr-3::mir-71; Pofm-1::DsRed]</i>                  | This study | N/A                        |
| <i>C. elegans</i> : <i>tir-1(ok2859)III</i> ; <i>hhIs64 [unc-119(+); Psur-5::UbV-GFP]III</i> ;<br><i>hhIs198[Podr-3::tir-1; Prps-0::hygR::mCherry]</i>                     | This study | N/A                        |
| <i>C. elegans</i> : <i>mir-71(n4115)</i> ; <i>tir-1(ok2859)III</i> ; <i>hhIs64 [unc-119(+); Psur-5::UbV-GFP]III</i> ; <i>hhIs198[Podr-3::tir-1; Prps-0::hygR::mCherry]</i> | This study | N/A                        |
| <i>C. elegans</i> : <i>mir-71(n4115)</i> ; <i>tir-1(ok2859)III</i> ; <i>hhIs64 [unc-119(+); Psur-5::UbV-GFP]III</i> ; <i>hhIs199[Pnhx-2::tir-1; Prps-0::hygR::mCherry]</i> | CGC        | Wormbase ID: WBVar00090219 |
| <i>C. elegans</i> : <i>hhIs64 [unc-119(+); Psur-5::UbV-GFP]III</i> ; <i>hhIs203[Pstr-1::mir-71; Prps-0::hygR::mCherry]</i>                                                 | This study | N/A                        |
| <i>C. elegans</i> : <i>mir-71(n4115)</i> ; <i>hhIs64 [unc-119(+); sur-5::UbiV-GFP]III</i> ;<br><i>hhIs203[Pstr-1::mir-71; Prps-0::hygR::mCherry]</i>                       | This study | N/A                        |
| <i>C. elegans</i> : <i>hhIs64 [unc-119(+); Psur-5::UbV-GFP]III</i> ; <i>ttx-3(ot22)X</i>                                                                                   | Hoppe lab  | N/A                        |
| <i>C. elegans</i> : <i>mir-71(n4115)</i> ; <i>hhIs64 [unc-119(+); Psur-5::UbV-GFP]III</i> ; <i>ttx-3(ot22)X</i>                                                            | This study | N/A                        |
| <i>C. elegans</i> : <i>hhIs64 [unc-119(+); sur-5::UbiV-GFP]III</i> ; <i>ceh-36(ks86)X</i>                                                                                  | This study | N/A                        |
| <i>hhIs64 [unc-119(+); sur-5::UbiV-GFP]III</i> ;<br><i>Ex[pceh-36::HisCl; pmyo-3::gfp]</i>                                                                                 | This study | N/A                        |

| Strain name                                                                                                    | Origin     | Resource |
|----------------------------------------------------------------------------------------------------------------|------------|----------|
| <i>mir-71(n4115)</i> ; <i>hhls64 [unc-119(+); sur-5::UbiV-GFP]III</i> ; <i>Ex[pceh-36::HisCl; pmyo-3::gfp]</i> | This study | N/A      |

## Supplementary Table 7

Oligonucleotides used in this study

| Name                             | 5'-3' sequence           | Source     |
|----------------------------------|--------------------------|------------|
| <b>Genotyping primer</b>         |                          |            |
| <i>gfp</i> genotyping            | CTACCTGTTCCATGGGTAAG     | This study |
| <i>gfp</i> genotyping            | CTTCCATCTTCAATGTTGTGTC   | This study |
| <i>hecd-1(tm2371)</i> genotyping | GTCTCGATAAATCAGCTGCC     | This study |
| <i>hecd-1(tm2371)</i> genotyping | TTCAGAAGATTTGGAGGACC     | This study |
| <i>hecd-1(tm2371)</i> genotyping | GACTATCGTATAAATGCTGTGGG  | This study |
| <i>mir-241(n4316)</i> genotyping | GAGCTGGCAAATAAACTGAAAC   | This study |
| <i>mir-241(n4316)</i> genotyping | CGGTGACATTCAATCCCTTC     | This study |
| <i>mir-241(n4316)</i> genotyping | TCGGCATCCATATAGTAATCGT   | This study |
| <i>mir-48(n4079)</i> genotyping  | CTTGAAACTTGGCTTTAACCTG   | This study |
| <i>mir-48(n4079)</i> genotyping  | CTTGAAACTTGGCTTTAACCTG   | This study |
| <i>nDf51</i> genotyping          | GACTTGGCGAACTGAAGAACTG   | This study |
| <i>nDf51</i> genotyping          | TTTGGAACGTTTCGGAATGAGAG  | This study |
| <i>nDf51</i> genotyping          | AAATGGTCTAAAGAATGGTCCGTG | This study |
| <i>mir-71(n4115)</i> genotyping  | CTTACAAGTTTACAGCTTCCAG   | This study |
| <i>mir-71(n4115)</i> genotyping  | TGACGTTAGGTTAAGCTTCAG    | This study |
| <i>mir-124(n4255)</i> genotyping | CACAGGAGGCATGTAATCTC     | This study |
| <i>mir-124(n4255)</i> genotyping | GCTCAACTGTCCAGTTTCTC     | This study |
| <i>mir-84(n4037)</i> genotyping  | ATCAAGTATAGGAGGAACGGG    | This study |
| <i>mir-84(n4037)</i> genotyping  | ATGCCTGACTCAGACTTCTC     | This study |
| <i>mir-84(n4037)</i> genotyping  | GAATGCGACATCACTGTCTG     | This study |
| <i>mir-34(n4276)</i> genotyping  | GACAGAAGTGCATTGTAGCA     | This study |
| <i>mir-34(n4276)</i> genotyping  | CTGGGTGGCTATACATTTCTC    | This study |
| <i>mir-34(n4276)</i> genotyping  | GTTAGCTGGTTGCATATTTCC    | This study |
| <i>tir-1(ok2859)</i> genotyping  | CTTCCATCTTCAATGTTGTGTC   | This study |
| <i>tir-1(ok2859)</i> genotyping  | TTTCCTCATTCTTGCTCAGTACAG | This study |

| Name                               | 5'-3' sequence                                                  | Source     |
|------------------------------------|-----------------------------------------------------------------|------------|
| <i>tir-1</i> (yz68) genotyping     | AAACTCTTTGACACTGACGATTGGGT                                      | This study |
| <i>tir-1</i> (yz68) genotyping     | GAGATACTATGCATGTATCGCGGTTTG                                     | This study |
| <i>tir-1</i> (yz68) genotyping     | TTTTTAAATTCCAATTCCACCAACCTTT                                    | This study |
| <i>tir-1</i> (yz68) genotyping     | CTAATCGGAGACTGACGTGATTGACCATA                                   | This study |
| <i>ttx-3</i> (ot22) genotyping     | TACCAAGTGTAGATTATTGATTGTTACCTGGCGGACATCATTT<br>AAACATCGCC       | This study |
| <i>ttx-3</i> (ot22) genotyping     | GCGGACATCATTTAAACATCCCT                                         | This study |
| <i>ttx-3</i> (ot22) genotyping     | GATGATGAAGAAGAGAGTGG                                            | This study |
| <i>tir-1</i> 3'UTR* genotyping     | GAACCTCCTACGCCAACGT                                             | This study |
| <i>tir-1</i> 3'UTR* genotyping     | GTTGAATCTGAAGGACTATGCTGC                                        | This study |
| <i>tir-1</i> 3'UTR*<br>_CrispR_fwd | GAACCTCCTACGCCAACGTG                                            | This study |
| <i>tir-1</i> 3'UTR*<br>_CrispR_rev | GCAGCATAGTCCTTCAGATTCAAC                                        | This study |
| <i>tir-1::gfp</i><br>_CrispR_fwd   | TATCAGGATGCATGTATGGCAAAAAG                                      | This study |
| <i>tir-1::gfp</i><br>_CrispR_rev   | GTCAGTGGAGAGGGTGAAGGTGA                                         | This study |
| <b>qRT-PCR primer</b>              |                                                                 |            |
| <i>cdc-42</i> qRT-PCR              | CTGCTGGACAGGAAGATTACG                                           | This study |
| <i>cdc-42</i> qRT-PCR              | CTCGGACATTCTCGAATGAAG                                           | This study |
| <i>pmp-3</i> qRT-PCR               | GTTCCCGTGTTCATCACTCAT                                           | This study |
| <i>pmp-3</i> qRT-PCR               | ACACCGTCGAGAAGCTGTAGA                                           | This study |
| <i>tir-1</i> qRT-PCR               | ATGATGATAACTGTGAGGATTGGG                                        | This study |
| <i>tir-1</i> qRT-PCR               | ATAGAAGGCATTTCTTTGGTGG                                          | This study |
| <i>gfp</i> qRT-PCR                 | ATGAGTAAAGGAGAAGAACTTTTC                                        | This study |
| <i>gfp</i> qRT-PCR                 | CCTTCAAACCTTGACTTCAGC                                           | This study |
| <b>Cloning primer</b>              |                                                                 |            |
| IR101_ <i>tir-1</i> _fwd           | ATGGGAGAGGAAATACTAACGGAACGAAATCAAC                              | This study |
| IR101_ <i>tir-1</i> _rev           | CGCACCTATAAAGGTACATGCTCTAGAGAG                                  | This study |
| IR101_ <i>tir-1_Podr-3</i> _fwd    | TAGAGCATGTACCTTTATAGGTGCGAGCAACTCGCTCCTTT<br>CATTG              | This study |
| IR101_ <i>tir-1_Podr-3</i> _rev    | GTTCCGTTAGTATTTCTCTCCCATATCTAAAAAACAATGA<br>TCTATGAGTAATTGATTTG | This study |
| IR101_ <i>Pnhx-2</i> _fwd          | CATGTACCTTTATAGGTGCGTCTGACACGCAAGACTTTTTTC                      | This study |
| IR101_ <i>rev</i>                  | CGCACCTATAAAGGTACATG                                            | This study |
| <i>Pnhx-2_tir-1</i> _fwd           | GGCTAGCAGAATGGGAGAGGAAATACTAAC                                  | This study |
| <i>tir-1_Pnhx-2</i> _rev           | CCTCTCCATTCTGCTAGCCAAGGGTCC                                     | This study |
| IR101_fwd                          | TAAAGCAATGATAAGATATGTTAAG                                       | This study |
| <i>tir-1</i> _IR101_rev            | CATATCTTATCATTGCTTTATCCGAAACATTCATTAGG                          | This study |

| <b>Name</b>              | <b>5'-3' sequence</b>                                          | <b>Source</b> |
|--------------------------|----------------------------------------------------------------|---------------|
| <i>Pstr-1_fwd</i>        | CAGAGCAGACTAGTCAAATGATATGAAGTTTGTGTTAAGAATT<br>TAGAAAATCTCAAAA | This study    |
| <i>Pstr-1_rev</i>        | GTCACTATGGTCGACCTGCATGCTTTATTATGGTATTTGGATAT<br>TTTGTAACACGG   | This study    |
| <i>Pstr-1_mir-71_fwd</i> | ACATATCCAGTCACTATGGCTTCCAGGTCACGATCCC                          | This study    |
| <i>Pstr-1_mir-71_rev</i> | CATTTGACTAGTCTGCTCTGAACGATGAAAGACAT                            | This study    |

## Supplementary Table 8

Oligonucleotides and repair templates used for CrispR/Cas9-mediated gene editing

| Oligonucleotides to clone sgRNAs into pIKIII      |                                                                  |            |
|---------------------------------------------------|------------------------------------------------------------------|------------|
| <i>tir-1</i> 3'UTR*_ <i>tir-1::gfp_sgRNA1_fwd</i> | AATTGCAAATCTAAATGTTTggaagagacttaattccgatGTTTAA<br>GAGCTAGAAATAGC | This study |
| <i>tir-1</i> 3'UTR*_ <i>tir-1::gfp_sgRNA1_rev</i> | GCTATTTCTAGCTCTAAACCatcgaattaagtctcttccAAACATT<br>TAGATTTGCAATT  | This study |
| <i>tir-1</i> 3'UTR*_ <i>tir-1::gfp_sgRNA2_fwd</i> | AATTGCAAATCTAAATGTTTggcagggcattgggtaaagtGTTTTAG<br>AGCTAGAAATAGC | This study |
| <i>tir-1</i> 3'UTR*_ <i>tir-1::gfp_sgRNA2_rev</i> | GCTATTTCTAGCTCTAAACcatttacccaatgccctgccAAACATTTAG<br>ATTTGCAATT  | This study |
| <b>sgRNAs</b>                                     |                                                                  |            |
| <i>tir-1</i> 3'UTR*_ <i>tir-1::gfp_sgRNA1</i>     | ATCGGAATTAAGTCTCTTCT                                             | This study |
| <i>tir-1</i> 3'UTR*_ <i>tir-1::gfp_sgRNA2</i>     | CATTTACCCAATGCCCTGCC                                             | This study |

### CrispR/Cas9 repair templates:

#### *tir-1* 3'UTR mutant:

TTCACAAAATATTATATTGCACGAGCACAAAAATTTGAGAATACGTAATGGTAACAAAGAAAACACTACAGTACCT  
 CCTTTAGTGACTACTATAGCTCTTTATGTGCTCGATTTTCGAAGGTTTTATCAATTATATCTTTTATTTTCAGATG  
 CCTTCTATCTCCGAAAAACTACCCAACAACGGTGGCAGACCACAAATACAGTAAGCCGTACTGGGCCATCCA  
 GAAGCATCGGTGGACCAAGAATGGAACCTCCTACGCCAACGTGTAAGTTGTTGAAACATCGTCACTTGGTATA  
 TTATTTAATTTTTTTAGTCTTTTCAGTTACACCAACTGGATCACAAGAACGTGCAACATCGACGAGAAGGAAAA  
 TTCAGCCTTCTGCATCCACAACCTTCTGATCGGAATTAAGTCTCTTCTTTAATCAATACATCAAGTGCCGGTTCATT  
 TTATCCATTTTCCAACAAAAACCAATTTTCTTCAACCATCCCAATATCAAATATCAAACCTCCAATGGTACCATC  
 ATCCCACACGAAAGTTTTAATGTATTTGACCCTCATTTTAAATCAGTCAAACCTCAAAAAAAGTGTCCACAAA  
 AAACCTGGAAATTCAAAGCGTAGAATCTATGATTTCAACTGTCTCTCTCTCTTTCGTCATTTACCCAATGCCCTGCC  
 GTTTTCTGCAATAATAATAATAATTGTAATAATCTCTATAAATTATGTGATTGATATGAAACCAAAAAGAAAAC  
 TCTGAACTTCACTTTCTTATAAGGTACCTGTTTATATATTCCGATCTCCATCTGTTTCATTGTTTTCACTTTTTCT  
 GTTTTATTTCTGCAACGTGTAATAGTCGATCAACGCCAACTCAGGAACCCATCAAATTCGAACCTTTAACTC  
 CCTCTTTAAATTGAACTTTTTATCTTAACAATTACCGGGTCTAACACCCTTCCAGATTTCTAATGTTATACCTAAT  
 GAATGTTTCGGATTATTGGGGATCCTCTAGAGTCGACCTGCAGGCATGCAAGCTTGGCGTAATCATGGTCATA  
 GCTGTTTCCTGTGTGAAATTGTTATCCGCTCACAATTCCACACAACATACGAGCCGGAAGCATAAAGTGTAAG



CTGGGGTGCCTAATGAGTGAGCTAACTCACATTAATTGCGTTGCGCTCACTGCCCGCTTCCAGTCGGGAAAC  
CTGTCGTGCCAGCTGCATTAATGAATCGGCCAACGCGCGGGGAGAGGCGGTTTGCATATTGGGCGCTCTCCG  
CTTCTCGCTCACTGACTCGCTGCGCTCGGTGCTTCGGCTGCGGCGAGCGGTATCAGCTCACTCAAAGGCGGT  
AATACGGTTATCCACAGAATCAGGGGATAACGCAGGAAAGAACATGTGAGCAAAGGCCAGCAAAGGCCA  
GGAACCGTAAAAAGGCCGCGTTGCTGGCGTTTTTCCATAGGCTCCGCCCCCTGACGAGCATCACAAAATCG  
ACGCTCAAGTCAGAGGTGGCGAAACCCGACAGGACTATAAAGATACCAGGCGTTTCCCCCTGGAAGCTCCCTC  
GTGCGCTCTCCTGTTCCGACCCTGCCGTTACCGGATACCTGTCCGCTTTCTCCCTTCGGGAAGCGTGGCGCTT  
TTCATAGCTCACGCTGTAGGTATCTCAGTTCGGTGTAGGTCGTTGCTCCAAGCTGGGCTGTGTGCACGAACC  
CCCCGTTACGCCGACCGCTGCGCCTTATCCGGTAACTATCGTCTTGAGTCCAACCCGGTAAGACACGACTTAT  
CGCCACTGGCAGCAGCCACTGGTAACAGGATTAGCAGAGCGAGGTATGTAGGCGGTGCTACAGAGTTCTTGA  
AGTGGTGGCCTAACTACGGCTACACTAGAAGAACAGTATTTGGTATCTGCGCTCTGCTGAAGCCAGTTACCTTC  
GGAAAAAGAGTTGGTAGCTCTTGATCCGGCAAACAACCACCGCTGGTAGCGGTGGTTTTTTTGTGCAAGC  
AGCAGATTACGCGCAGAAAAAAGGATCTCAAGAAGATCCTTTGATCTTTTCTACGGGGTCTGACGCTCAGTG  
GAACGAAAACCTCACGTTAAGGGATTTTGGTCATGAGATTATCAAAAAGGATCTTCACCTAGATCCTTTAAATT  
AAAAATGAAGTTTTAAATCAATCTAAAGTATATATGAGTAACTTGGTCTGACAGTTACCAATGCTTAATCAGT  
GAGGCACCTATCTCAGCGATCTGTCTATTTGTTTCATCCATAGTTGCTGACTCCCCGTCGTGTAGATAACTACG  
ATACGGGAGGGCTTACCATCTGGCCCCAGTGCTGCAATGATACCGCGAGACCCACGCTCACCGGCTCCAGATT  
TATCAGCAATAAACCAGCCAGCCGGAAGGGCCGAGCGCAGAAGTGGTCTGCAACTTATCCGCTCCATCCA  
GTCTATTAATTGTTGCCGGAAGCTAGAGTAAGTAGTTGCGCAGTTAATAGTTTGCACAACGTTGTTGCCATTG  
CTACAGGCATCGTGGTGTACGCTCGTCGTTTGGTATGGCTTCATTAGCTCCGGTCCCAACGATCAAGGCGA  
GTTACATGATCCCCATGTTGTGCAAAAAAGCGTTAGCTCCTTCGGTCTCCGATCGTTGTCAGAAGTAAGTT  
GGCCGAGTGTATCACTCATGGTTATGGCAGCACTGCATAATTCTTACTGTCATGCCATCCGTAAGATGCTT  
TTCTGTGACTGGTGAAGTACTCAACCAAGTCATTCTGAGAATAGTGTATGCGGCGACCGAGTTGCTCTTGCCCGG  
CGTCAATACGGGATAATACCGCGCCACATAGCAGAACTTTAAAAGTGTTCATCATTGGAAAACGTTCTTCGGG  
GCGAAAACCTCAAGGATCTTACCGCTGTTGAGATCCAGTTCGATGTAACCCACTCGTGCACCCAACTGATCTT  
CAGCATCTTTTACTTTCACCAGCGTTTCTGGGTGAGCAAAAACAGGAAGGCAAAATGCCGCAAAAAGGGAAT  
AAGGGCGACACGGAATGTTGAATACTCATACTCTTCTTTTTCAATATTATTGAAGCATTATCAGGGTTATTG  
TCTCATGAGCGGATACATATTTGAATGTATTTAGAAAAATAAACAATAGGGGTTCCGCGCACATTTCCCCGAA  
AAGTGCCACCTGACGTCTAAGAAACCATTATTATCATGACATTAACCTATAAAAATAGGCGTATCACGAGGCC  
TTTCGTC
